1  
2 **Astrocyte nanoscale morphology controls  $\text{Ca}^{2+}$**   
3 **signals at tripartite synapses**  
4 Audrey DENIZOT<sup>1\*</sup>, Misa ARIZONO<sup>2, 3</sup>, U. Valentin NÄGERL<sup>2, 3</sup>,  
5 Hugues BERRY<sup>4, 5</sup>, De Schutter Erik<sup>1</sup>,

6 **1** Okinawa Institute of Science and Technology, Computational  
7 Neuroscience Unit, Onna-Son, Japan  
8 **2** Interdisciplinary Institute for Neuroscience, Université de Bordeaux,  
9 Bordeaux, France  
10 **3** Interdisciplinary Institute for Neuroscience, CNRS UMR 5297,  
11 Bordeaux, France  
12 **4** Univ Lyon, LIRIS, UMR5205 CNRS, F-69621, Villeurbanne, France  
13 **5** INRIA, F-69603, Villeurbanne, France

14 \* audrey.denizot3@oist.jp

## 15 **Abstract**

16  $\text{Ca}^{2+}$  signals in astrocytes can trigger the modulation of neuronal ac-  
17 tivity. Recent developments in  $\text{Ca}^{2+}$  imaging and super-resolution mi-  
18 croscopy have allowed to characterize the complex morphology of astro-  
19 cyte branchlets that communicate with neurons and the associated  $\text{Ca}^{2+}$   
20 microdomains. Here, we use computational tools to investigate the causal  
21 relationship between branchlet morphology and spatio-temporal profile of  
22  $\text{Ca}^{2+}$  signals. 3D reticular branchlet geometries were designed, alternating  
23 between large (nodes) and thinner cellular compartments (shafts). Sim-  
24 ulations confirm experimental observations that a decreased shaft width  
25 is associated with a decreased diffusion flux from nodes, enhancing local  
26  $\text{Ca}^{2+}$  activity. Upon successive neuronal stimuli, a decreased shaft width  
27 facilitates signal propagation in astrocyte branchlets. We further identify  
28 parameters that decrease local  $\text{Ca}^{2+}$  activity, such as a discontinuous ER  
29 geometry and an increased  $\text{Ca}^{2+}$  buffering. Overall, this study proposes  
30 key parameters that regulate  $\text{Ca}^{2+}$  activity locally, potentially favoring  
31 neuron-astrocyte communication at tripartite synapses.

## 32 **Introduction**

33 Astrocytes are glial cells of the central nervous system that are essential  
34 for brain development and function, playing key roles in e.g ionic home-  
35 ostasis, lactate metabolism and the uptake of neurotransmitters (see the  
36 review from Verkhratsky & Nedergaard [1] for more details). Furthermore,  
37 according to the concept of tripartite synapses [2], astrocytes take part in  
38 information processing. In response to neuronal stimulation,  $\text{Ca}^{2+}$  signals  
39 can be observed in astrocytes. The first  $\text{Ca}^{2+}$  signals that have been char-  
40 acterized are  $\text{Ca}^{2+}$  waves that propagate, through gap junction coupling, in  
41 astrocyte networks [3].  $\text{Ca}^{2+}$  waves can also propagate within the branches  
42 of a single astrocyte, sporadically propagating to the soma [4, 5]. The re-  
43 cent development of  $\text{Ca}^{2+}$  imaging techniques that provide better spatial

44 and temporal resolution have revealed the existence of spatially-restricted  
45  $\text{Ca}^{2+}$  signals in astrocytes, referred to as microdomains or hotspots [5–15].  
46 As one astrocyte can contact  $\approx 20,000$ – $120,000$  synapses simultaneously in  
47 the mouse hippocampus [16], up to two million in the human brain [17],  
48 those local, fast  $\text{Ca}^{2+}$  signals could enable the astrocyte to powerfully yet  
49 precisely control the flow of information through synaptic circuits.

50  
51 80% of astrocyte  $\text{Ca}^{2+}$  signals, notably  $\text{Ca}^{2+}$  hotspots, occur in thin  
52 branchlets, characterized by diameters that are  $< 200\text{nm}$  [5], which appear  
53 blurry when imaged using conventional light microscopy. The geometry  
54 of those compartments, forming the gliapil, has thus first been character-  
55 ized by electron microscopy (EM), which revealed their physical proximity  
56 to neurons and their complex reticular morphology [16, 18, 19]. Astro-  
57 cyte branchlets appeared to display an organized ultrastructure, forming  
58 “glial microdomains” that wrapped around synapses, potentially restrict-  
59 ing neuron-astrocyte communication [19]. This hypothesis is however hard  
60 to test experimentally because of the small size of astrocyte branchlets  
61 and because EM does not allow to study dynamical phenomena in live  
62 tissue. Recently, Arizono et al. [15] have overcome those issues by combin-  
63 ing confocal  $\text{Ca}^{2+}$  imaging and 3D-Super-Resolution Stimulated Emission  
64 Depletion (STED) microscopy. Their results suggest that the propagation  
65 of  $\text{Ca}^{2+}$  signals in astrocyte branchlets is influenced by their morphology.  
66 They notably identified bulbous structures, referred to as nodes, as pref-  
67 erential sites of  $\text{Ca}^{2+}$  activity in astrocytes. Whether there is a causal re-  
68 lationship between astrocyte branchlet morphology and the characteristics  
69 of  $\text{Ca}^{2+}$  signals however remains unclear and difficult to test experimen-  
70 tally. As  $\text{Ca}^{2+}$  microdomains might allow astrocytes to finely modulate  
71 neuronal communication at the single synapse level, elucidating the bio-  
72 physical mechanisms that regulate their formation is crucial.

73  
74 Here, we use computational tools to investigate the effect of the mor-  
75 phology of astrocyte branchlets on  $\text{Ca}^{2+}$  activity. To account for the  
76 stochasticity of molecular interactions in small volumes such as those of as-  
77 trocyte branchlets, we use the voxel-based model of  $\text{IP}_3\text{R}$ -mediated  $\text{Ca}^{2+}$   
78 signals from Denizot et al. [20]. Idealized geometries of branchlets were  
79 designed based on super-resolution microscopy images in live tissue [15].  
80 Branchlets consist in alternations of structures referred to as nodes and  
81 shafts. Our results suggest that molecular diffusion flux decreases with  
82 shaft width, which enhances  $\text{Ca}^{2+}$  peak probability, duration and ampli-  
83 tude in the stimulated node. In case of successive node stimulation events,  
84 thin shafts allow signal propagation despite an omitted stimulus. Thin  
85 shafts thus allow more robust signal propagation. Furthermore, we pro-  
86 pose several mechanisms that decrease local  $\text{Ca}^{2+}$  activity in the gliapil:  
87 an increased shaft width, a discontinuous ER geometry and an increased  
88  $\text{Ca}^{2+}$  buffering .

89  
90 Overall, our results shed light on the mechanisms that can influence  
91 local  $\text{Ca}^{2+}$  signals in astrocyte branchlets. Importantly, our results pro-  
92 vide evidence that node compartmentalization, resulting from a reduced  
93 diffusion flux from nodes connected to thin shafts, can increase  $\text{Ca}^{2+}$  ac-  
94 tivity locally. This study provides a better understanding of the effect of  
95 the morphology of the cell and of the organelles on  $\text{Ca}^{2+}$  signals at the  
96 nanoscale.

## 97 Results

### 98 Geometrical representation of typical astrocyte branch- 99 lets

100 In order to investigate the effect of the geometry of astrocyte branch-  
101 lets on the spatio-temporal properties of  $\text{Ca}^{2+}$  signals, we have designed  
102 geometries of typical astrocyte branchlets, derived from the recent char-  
103 acterization of their ultrastructure at high spatial resolution (50 nm in  
104 x-y) in organotypic brain slices [15]. Geometries consist in alternations of  
105 bulbous structures, nodes, connected to each other with cylindrical struc-  
106 tures, referred to as shafts. Geometries with different shaft width  $d_{\text{shaft}}$  and  
107 constant node width were designed (Fig 1A). Screenshots of the resulting  
108 meshes are presented in Supplemental Fig S1. The geometry of the ER in  
109 the gliapil has not been characterized in live tissue so far. Thus, as a first  
110 approximation, ER geometry was considered to be identical to the geome-  
111 try of the astrocyte branchlet: node/shaft successions. A sensitivity study  
112 has been performed to investigate the effect of voxel size on the kinetics of  
113 the molecular interactions modeled. Information on the voxel sizes of the  
114 different meshes used is presented in Supplemental Table S1. Results are  
115 presented in Supplemental Fig S2. Meshes that contained voxels that were  
116  $< 50\text{nm}^3$  were characterized by aberrant kinetics, resulting in inaccurate  
117 average numbers of molecules in a given state. We have thus made sure,  
118 while meshing the geometries in which we ran the simulations, that no  
119 voxels were  $< 50 \text{ nm}^3$ .

120

Table 1: **Characteristics of the geometries of astrocyte branchlets used in this study.**  $V_{\text{cyt}}$  is the cytosolic volume,  $S_{\text{PM}}$  is the area of the plasma membrane and  $S_{\text{ER}}$  is the area of the ER membrane. Volumes are expressed in  $\text{nm}^3$  and areas in  $\text{nm}^2$ .

| Geom                                 | $V_{\text{cyt}} (\text{nm}^3)$ | $S_{\text{PM}} (\text{nm}^2)$ | $S_{\text{ER}} (\text{nm}^2)$ |
|--------------------------------------|--------------------------------|-------------------------------|-------------------------------|
| “5nodes” $d_{\text{shaft}} = d_0$    | $6.20 \times 10^8$             | $7.73 \times 10^6$            | $2.19 \times 10^6$            |
| “5nodes” $d_{\text{shaft}} = d_0/2$  | $2.63 \times 10^8$             | $4.95 \times 10^6$            | $1.28 \times 10^6$            |
| “5nodes” $d_{\text{shaft}} = d_0/3$  | $1.95 \times 10^8$             | $4.10 \times 10^6$            | $9.99 \times 10^5$            |
| “No ER” $d_{\text{shaft}} = d_0$     | $6.73 \times 10^8$             | $7.73 \times 10^6$            | 0.00                          |
| “No ER” $d_{\text{shaft}} = d_0/2$   | $2.83 \times 10^8$             | $4.95 \times 10^6$            | 0.00                          |
| “No ER” $d_{\text{shaft}} = d_0/3$   | $2.10 \times 10^8$             | $4.09 \times 10^6$            | 0.00                          |
| “Node ER” $d_{\text{shaft}} = d_0$   | $6.67 \times 10^8$             | $7.75 \times 10^6$            | $4.17 \times 10^5$            |
| “Node ER” $d_{\text{shaft}} = d_0/2$ | $2.74 \times 10^8$             | $4.96 \times 10^6$            | $4.37 \times 10^5$            |
| “Node ER” $d_{\text{shaft}} = d_0/3$ | $2.00 \times 10^8$             | $4.11 \times 10^6$            | $4.41 \times 10^5$            |
| “Cyl ER” $d_{\text{shaft}} = d_0$    | $6.27 \times 10^8$             | $7.74 \times 10^6$            | $2.03 \times 10^5$            |
| “Cyl ER” $d_{\text{shaft}} = d_0/2$  | $2.77 \times 10^8$             | $4.95 \times 10^6$            | $8.78 \times 10^5$            |
| “Cyl ER” $d_{\text{shaft}} = d_0/3$  | $2.07 \times 10^8$             | $4.09 \times 10^6$            | $5.86 \times 10^5$            |

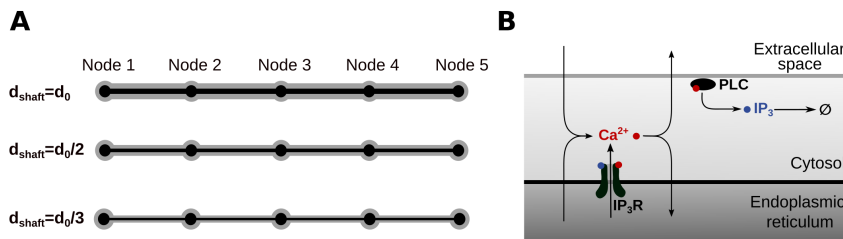

Fig 1: **Geometries and kinetic scheme used for simulating  $\text{Ca}^{2+}$  dynamics in node/shaft structures of the gliapil.** (A) Geometries reproducing node/shaft geometries of the gliapil [15, 21] were designed. Nodes are approximated as spheres of diameter 380 nm and shafts as  $1\mu\text{m}$ -long cylinders. Conic geometries were added between spheres and cylinders in order to get smoother, more realistic geometries. The geometries designed in this study, referred to as “5 nodes”, contain 5 identical nodes and 4 identical shafts. Geometries were characterized by different shaft widths:  $d_{\text{shaft}} = d_0 = 380\text{nm}$ ,  $d_{\text{shaft}} = \frac{d_0}{2}$  and  $d_{\text{shaft}} = \frac{d_0}{3}$ . The associated cytosolic volume, plasma and ER membrane areas are presented in Table 1. (B) Biochemical processes included in the model.  $\text{Ca}^{2+}$  can enter/exit the cytosol from/to the extracellular space or the endoplasmic reticulum (ER), resulting from the activity of  $\text{Ca}^{2+}$  channels/pumps.  $\text{Ca}^{2+}$  and IP<sub>3</sub> diffuse in the cytosol following Brownian motion. The kinetics of IP<sub>3</sub>R channels corresponds to the 8-state Markov model from [22], adapted from [23, 24]. When both IP<sub>3</sub> and  $\text{Ca}^{2+}$  are bound to IP<sub>3</sub>R activating binding sites, the IP<sub>3</sub>R is in open state and  $\text{Ca}^{2+}$  enters the cytosol.  $\text{Ca}^{2+}$  can activate Phospholipase C  $\delta$  (PLC $\delta$ ), which results in the production of IP<sub>3</sub>. For more details, please refer to [22].

## 121 Thin shafts favor node compartmentalization

122 In order to test whether the geometries designed in this study are a  
123 good approximation of the reticular ultrastructure of the gliapil, we have  
124 compared molecular diffusion flux in those geometries with those reported  
125 experimentally. To do so, we simulated photobleaching experiments and  
126 compared our results to experimental results from Arizono et al. [15]. The  
127 principle of bleaching simulations is presented in the Methods section and  
128 in Supplemental Fig S3. Briefly, fluorescing molecules ZSGreen encounter  
129 conformational changes at bleaching time, resulting in a decrease of the flu-  
130 orescence level in the region of interest to  $I_0$ . Then, because of the diffusion  
131 of fluorescent ZSGreen into the region of interest, fluorescence increases un-  
132 til it reaches  $I_{inf}$  (Supplemental Movie 1). Here, we refer to a high node  
133 compartmentalization when the time to recovery after bleaching,  $\tau$ , is high.

134  
135 Bleaching traces in simulations are both qualitatively (Fig 2B) and  
136 quantitatively (Fig 2C) similar to experimental bleaching traces, for shaft  
137 width  $d_{shaft} = d_0$  and  $d_{shaft} = \frac{d_0}{2}$ . Indeed, no significant difference of  $I_0$   
138 (Fig 2C1),  $I_{inf}$  (Fig 2C2) and  $\tau$  (Fig 2C3) was observed between simu-  
139 lations and experimental traces. Simulations were also performed with  
140  $d_{shaft} = \frac{d_0}{3}$ . Our simulations successfully reproduce experimental bleach-  
141 ing experiments and suggest that  $\tau$ , and thus node compartmentalization,  
142 increases when shaft width decreases (Fig 2C3). This result is not surpris-  
143 ing as a decreased shaft width results in a smaller size of the exit point for  
144 diffusing molecules from the node. This is similar to e.g dendritic spines,  
145 which compartmentalization is increased for thinner spine necks [25]. The  
146 geometries that we have designed can thus be considered as a reasonable  
147 approximation of the ultrastructure of the gliapil observed experimentally  
148 in live tissue.

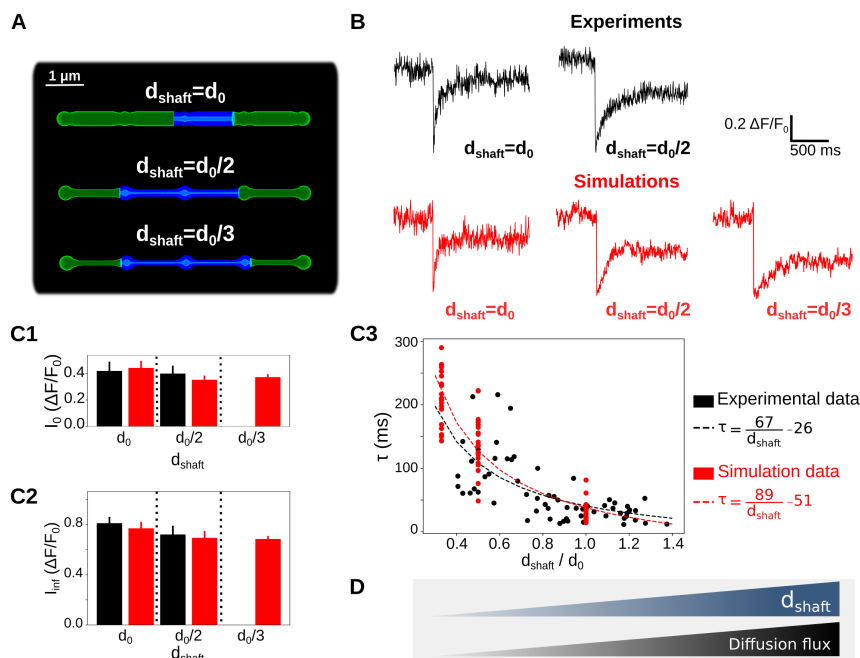

**Fig 2: Simulations confirm that thin shafts favor node compartmentalization.** (A) Geometries of different shaft widths  $d_{\text{shaft}}$ ,  $d_{\text{shaft}} = d_0$ ,  $\frac{d_0}{2}$  and  $\frac{d_0}{3}$ , used in the bleaching simulations. Blue color represents the bleached volume, which varied depending on the value of  $d_{\text{shaft}}$  in order to fit experimental values of  $I_0$  and  $I_{\text{inf}}$ . (B) Representative experimental (top) and simulation (bottom) traces for different shaft width values. Note that simulations were also performed for  $d_{\text{shaft}} = \frac{d_0}{3}$ . (C) Quantification of  $I_0$  (C1),  $I_{\text{inf}}$  (C2) and  $\tau$  (C3) values in simulations (red) compared to experiments (black). Note that no experimental data was available for  $d_{\text{shaft}} = \frac{d_0}{3}$ . In C1 and C2,  $n=5 \times 2$  and  $20 \times 3$  for experiments and simulations, respectively. Data are presented as mean  $\pm$  STD. In C3,  $n=66$  and  $n=20 \times 3$  for experiments and simulations, respectively.  $\tau$  is negatively correlated to  $d_{\text{shaft}}$  in experiments ( $n=66$  from 7 slices; Spearman  $r=-0.72$ ,  $p<0.001$  \*\*\*) and simulations ( $n=60$ ; Spearman  $r=-0.89$ ,  $p<0.001$  \*\*\*). Black and red lines represent curve fit of  $\tau$  as a function of  $d_{\text{shaft}}$  of the form  $\tau = a * \frac{1}{d_{\text{shaft}}} + b$  for experiments and simulations, respectively. (D) Schematic summarizing the conclusion of this figure: diffusion flux increases with  $d_{\text{shaft}}$ . In that sense, thin shafts favor node compartmentalization. Data in panels C1 and C2 are represented as mean  $\pm$  STD,  $n=20$  for each geometry.

## 149 Thin shafts are associated with increased $\text{Ca}^{2+}$ activity 150 in nodes

151 80% of astrocyte  $\text{Ca}^{2+}$  activity occurs in thin branchlets of the gli-  
152 apil [5], which suggests that most neuron-astrocyte communication occurs  
153 at fine astrocyte branchlets. As we observed that a decreased shaft width is  
154 associated with a decreased diffusion flux, i.e an increased compartmental-  
155 ization of nodes, we have tested whether this effect influences  $\text{Ca}^{2+}$  activity  
156 upon neuronal stimulation. To do so, we have first analyzed  $\text{Ca}^{2+}$  signals

157 resulting from the injection of  $IP_3$  in one node (Node 1). Signals were  
158 recorded both in the stimulated node and in the neighboring node (Node  
159 2) (Fig 3A, Supplemental Movie 2). Representative  $Ca^{2+}$  traces in node 1  
160 and 2 for  $d_{\text{shaft}} = d_0, \frac{d_0}{2}$  and  $\frac{d_0}{3}$  are displayed in Fig 3A. Our first notice-  
161 able result is that  $Ca^{2+}$  peak probability increases when  $d_{\text{shaft}}$  decreases,  
162 both in nodes 1 and 2 (Fig 3B1). The time to 1<sup>st</sup> peak increases with  
163  $d_{\text{shaft}}$  (Fig 3B2). On the contrary, peak amplitude (Fig 3B3) and duration  
164 (Fig 3B4) increase when  $d_{\text{shaft}}$  decreases, both in nodes 1 and 2. Interest-  
165 ingly,  $Ca^{2+}$  signals were not significantly different between node 1 and 2,  
166 suggesting an "all-or-nothing" propagation to neighboring nodes. Indeed,  
167 as soon as a  $Ca^{2+}$  peak was detected in node 1, an event of similar size  
168 was always detected in node 2. In order to better understand the mecha-  
169 nisms responsible for the increased  $Ca^{2+}$  peak probability, amplitude and  
170 duration when  $d_{\text{shaft}}$  decreases, we have measured the frequency of  $IP_3R$   
171 opening in nodes 1 and 2. The frequency of  $IP_3R$  opening increases when  
172  $d_{\text{shaft}}$  decreases (Fig 3B5). Note that the duration of  $IP_3R$  opening and  
173 the number of  $IP_3R$  open per  $Ca^{2+}$  peak did not vary with  $d_{\text{shaft}}$ . This  
174 increase of  $IP_3R$  opening frequency when  $d_{\text{shaft}}$  decreases probably results  
175 from the increased residency time of molecules in nodes connected to thin  
176 shafts (Fig 3C). Indeed, a thin shaft can "trap"  $Ca^{2+}$  and  $IP_3$  longer in  
177 the node, thus locally increasing the probability of  $IP_3Rs$  to open, re-  
178 sulting in larger  $Ca^{2+}$  peaks. For more details, the reader can refer to  
179 the theoretical work investigating the narrow escape problem for diffusion  
180 in microdomains [26]. Nodes connected to thinner shafts, despite being  
181 characterized by a lower diffusion flux (Fig 2), could thus consist in sig-  
182 nal amplification units, favoring the generation of larger signals, therefore  
183 increasing  $Ca^{2+}$  peak probability, amplitude and duration both in the stim-  
184 ulated node and in neighboring nodes.

185  
186 In order to better understand the variability of  $Ca^{2+}$  signals with  $d_{\text{shaft}}$ ,  
187 the effect of the volume of the astrocytic process was tested. Geometries  
188 with  $d_{\text{shaft}} = d_0, \frac{d_0}{2}$  and  $\frac{d_0}{3}$  are characterized by node/shaft width ratios  $\delta$   
189 of 1, 2 and 3, respectively. Those geometries are further characterized by  
190 different volumes:  $V_1=0.620 \mu m^3$ ,  $V_2=0.263 \mu m^3$  and  $V_3=0.195 \mu m^3$ . To  
191 test whether the effect of node/shaft width ratio  $\delta$  on  $Ca^{2+}$  signals resulted  
192 from the decreased branchlet volume with  $\delta$ , a subset of simulations were  
193 performed in a geometry with  $\delta=1$  and  $V_1=0.258 \mu m^3$ , which is similar to  
194  $V_2$  and  $V_3$  (see Methods). The results are presented in Supplemental Fig  
195 S4 and suggest that it is node/shaft width ratio rather than shaft width  
196 itself that influences  $Ca^{2+}$  residency time in nodes. A high node/shaft  
197 width ratio results in a higher  $IP_3R$  opening frequency and a higher peak  
198 amplitude in nodes. Further, our results illustrate that the increase of  $Ca^{2+}$   
199 activity when shaft width decreases mostly results from the associated  
200 decrease of cellular volume.

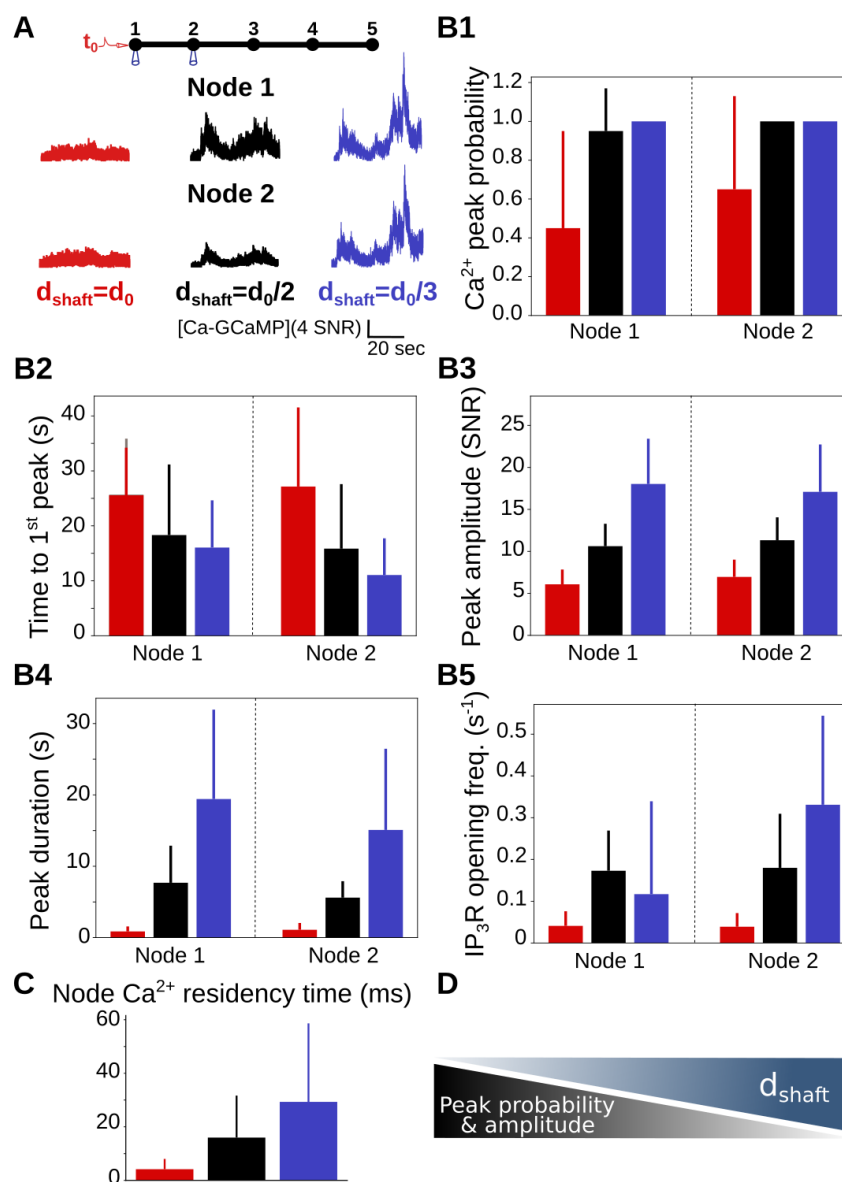

**Fig 3: Ca<sup>2+</sup> peak probability, amplitude and duration increase when shaft width decreases.** (A) (Top) Neuronal stimulation protocol simulated for each geometry: node 1 was stimulated at  $t=t_0=1s$ , while Ca<sup>2+</sup> activity was monitored in nodes 1 and 2. Representative Ca<sup>2+</sup> traces for shaft width  $d_{\text{shaft}} = d_0$  (red),  $\frac{d_0}{2}$  (black) and  $\frac{d_0}{3}$  (blue) in node 1 (Middle) and node 2 (Bottom), expressed as SNR (see Methods). (B) Quantification of the effect of  $d_{\text{shaft}}$  on Ca<sup>2+</sup> signal characteristics. Data are represented as mean  $\pm$  STD,  $n=20$  for each geometry. (B1) Ca<sup>2+</sup> peak probability increases when  $d_{\text{shaft}}$  decreases in both node 1 and 2 (\*\*\*). (B2) Time to 1<sup>st</sup> peak increases with  $d_{\text{shaft}}$  in both Node 2 (\*) and Node 1 (\*\*\*). (B3) Peak amplitude increases when  $d_{\text{shaft}}$  decreases in both nodes 1 and 2 (\*\*\*). (B4) Peak duration increases when  $d_{\text{shaft}}$  decreases in both nodes 1 and 2 (\*\*\*). (B5) The frequency of IP<sub>3</sub>R opening increases when  $d_{\text{shaft}}$  decreases in both nodes 1 and 2 (\*\*\*). Ca<sup>2+</sup> peak characteristics were not statistically different between node 1 and node 2, for  $d_{\text{shaft}} = d_0$ ,  $\frac{d_0}{2}$  and  $\frac{d_0}{3}$ . (C) Ca<sup>2+</sup> residency time in node 1 increases when  $d_{\text{shaft}}$  decreases (\*\*\*,  $n=300$ ). (D) Schematic summarizing the main result from this figure: Ca<sup>2+</sup> peak probability and amplitude increase when shaft width decreases. The effect of  $d_{\text{shaft}}$  on each Ca<sup>2+</sup> signal characteristic was tested using one-way ANOVA. Significance is assigned by \* for  $p \leq 0.05$ , \*\* for  $p \leq 0.01$ , \*\*\* for  $p \leq 0.001$ .



201 In the simulations presented in Fig 3, IP<sub>3</sub>R density was constant. As  
202 ER area varied with  $d_{\text{shaft}}$  (see Table 1) and as IP<sub>3</sub>R density was kept constant,  
203 the total number of IP<sub>3</sub>R molecules differed and equaled 620, 363  
204 and 283, for  $d_{\text{shaft}} = d_0$ ,  $\frac{d_0}{2}$  and  $\frac{d_0}{3}$ , respectively. To test whether the effect  
205 of  $d_{\text{shaft}}$  on Ca<sup>2+</sup> signals reported in Fig 3 resulted from the variation of  
206 the number of IP<sub>3</sub>R molecules with  $d_{\text{shaft}}$ , we have performed simulations  
207 in which the number of IP<sub>3</sub>R molecules did not vary with  $d_{\text{shaft}}$ . The results  
208 are presented in Supplemental Fig S5 and confirm that Ca<sup>2+</sup> peak  
209 probability, duration and amplitude increase when  $d_{\text{shaft}}$  decreases. In order  
210 to test the effect of reflective boundary conditions, we have performed  
211 simulations in which the tetrahedra near the outer surface of Node 4 consisted  
212 in clamped boundary conditions (Supplemental Fig S6). Similarly  
213 to simulations with reflective boundary conditions, Ca<sup>2+</sup> peak probability,  
214 duration and amplitude increased when  $d_{\text{shaft}}$  decreased. Simulations in  
215 which Node 3 was stimulated were also performed. Results are presented  
216 in Supplemental Fig S7. Ca<sup>2+</sup> peak probability, duration and amplitude  
217 similarly increased when  $d_{\text{shaft}}$  decreased and Ca<sup>2+</sup> peak characteristics  
218 were similar in Node 3 and 4.

219  
220 Finally, we have tested whether the increased Ca<sup>2+</sup> activity of induced  
221 signals in geometries with thin shafts could be observed for spontaneous  
222 Ca<sup>2+</sup> signals. To do so, 200 Ca<sup>2+</sup> ions were infused in Node 1 at time  
223  $t=t_0$ , thus mimicking a Ca<sup>2+</sup> signal resulting from the spontaneous opening  
224 of Ca<sup>2+</sup> channels. Ca-GCaMP signals were then monitored in nodes 1  
225 and 2. The results are presented in Supplemental Fig S8. Simulation  
226 results suggest that, similarly to neuronal-induced Ca<sup>2+</sup> signals (Fig 3),  
227 peak probability, amplitude and duration increase when  $d_{\text{shaft}}$  decreases,  
228 both in nodes 1 and 2. Furthermore, the delay of Ca<sup>2+</sup> peaks decreases  
229 with  $d_{\text{shaft}}$ . Cellular geometry thus affects both spontaneous and induced  
230 Ca<sup>2+</sup> signals. Consistently with experimental results [15], we observe an  
231 increase of the amplitude ratio of spontaneous Ca<sup>2+</sup> signals between Node  
232 2 and Node 1 with shaft width (Spearman  $r=0.0006$ ,  $p\text{-value} < 0.001$  \*\*\*).  
233 This could result from the decreased diffusion flux from nodes connected  
234 to thin shafts, so that a smaller proportion of molecules would reach the  
235 neighboring node.

236 Overall, our results suggest that a decreased shaft width, although resulting  
237 in a decreased diffusion flow from nodes, increases Ca<sup>2+</sup> peak probability,  
238 amplitude and duration.

239

## 240 **Discontinuous ER geometry is associated with decreased** 241 **Ca<sup>2+</sup> activity**

242 As the ultrastructure of the ER in the geometries presented in Fig 1  
243 was arbitrary, we have next investigated to what extent the effect of shaft  
244 width  $d_{\text{shaft}}$  reported in Fig 3 depends on ER geometry. To do so, we  
245 have created geometries with the same cellular geometry as in Fig 1 while  
246 varying the geometry of the ER (Fig 4A, Fig S7A). Simulations performed  
247 in the geometries used so far in this study, in which the ER consists in  
248 alternations of nodes and shafts, are here referred to as “Node/shaft ER”.  
249 A subset of simulations, referred to as “Cyl ER”, has been performed in  
250 meshes that contain continuous, cylindrical ER, with a length of  $l_{\text{ER}} = 6274$   
251 nm and a diameter of 108, 54 and 36 nm, for  $d_{\text{shaft}} = d_0$ ,  $\frac{d_0}{2}$  and  $\frac{d_0}{3}$ , respec-

252 tively. Another subset of simulations, referred to as “Node ER”, contained  
253 discontinuous ER, which consisted in spheres with a diameter of 54 nm, lo-  
254 cated in nodes. Finally, simulations referred to as “No ER” were performed  
255 without any ER. Node 1 was stimulated at  $t=t_0=1s$ , while  $Ca^{2+}$  activity  
256 was monitored in nodes 1 and 2. Note that no signals occur in the “No  
257 ER” geometry, as there are no  $IP_3R$  channels.  $Ca^{2+}$  signals qualitatively  
258 (Fig 4B) and quantitatively (Fig 4C) varied depending on ER geometry.  
259 Time to  $1^{st}$  is higher (Fig 4C2) and  $Ca^{2+}$  peak probability (Fig 4C1),  
260 amplitude (Fig 4C3) and duration (Fig 4C4) as well as the frequency of  
261  $IP_3R$  opening (Fig 4C5) are lower in geometries with discontinuous com-  
262 pared to continuous ER geometry. Note that  $IP_3R$  opening frequency was  
263 larger in simulations in “Node ER” geometry than in “Node/shaft ER”  
264 geometry with  $IP_3Rs$  located in nodes, although not resulting in any sig-  
265 nificant difference of peak characteristics. Similarly to “Node/shaft” ER  
266 geometry, there was no significant difference between peak characteristics  
267 in Node 1 compared to Node 2 and  $Ca^{2+}$  peak probability, amplitude  
268 and duration increased when  $d_{shaft}$  decreased, for all ER geometries tested  
269 (Supplemental Fig S9B-C).  $Ca^{2+}$  peak probability, amplitude and dura-  
270 tion were larger in “Cyl ER” geometries than in “Node ER” geometry  
271 but lower than in “Node/shaft ER” geometry (Supplemental Fig S9B-C).  
272 Interestingly,  $Ca^{2+}$  node residency time did not vary depending on ER  
273 morphology (Supplemental Fig S10A), suggesting that the increased  $Ca^{2+}$   
274 activity in branchlets containing continuous ER might not result from ER  
275 morphology itself. To further understand those results, as ER surface area  
276 is increased in “Node/shaft ER” geometry compared to “Node ER” geom-  
277 etry, we have tested whether the increased  $Ca^{2+}$  dynamics in branchlets  
278 with continuous ER results from the associated increase of the number of  
279  $IP_3R$  channels in the branchlet. For example, there are 283 and 125  $IP_3R$   
280 channels in “Node/shaft ER” and “Node ER” geometry with  $d_{shaft}=\frac{d_0}{3}$ ,  
281 respectively. To do so, simulations were performed in “Node/shaft ER”  
282 and “Node ER” with the same amount of  $IP_3R$  channels, 300, located in  
283 nodes.  $Ca^{2+}$  signals did not vary depending on ER morphology in those  
284 simulations (Supplemental Fig S10B). Those results suggest that the de-  
285 creased  $Ca^{2+}$  activity in branchlets with discontinuous ER mainly results  
286 from the associated decreased surface area compared to continuous ER ge-  
287 ometries.

288

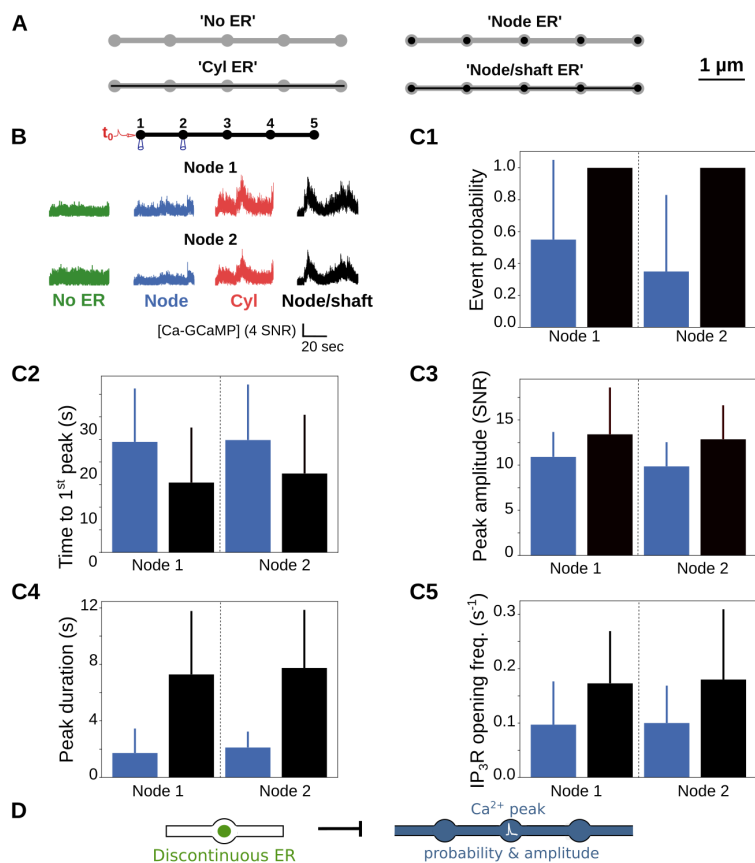

**Fig 4: ER discontinuity is associated with decreased  $\text{Ca}^{2+}$  peak probability, amplitude and duration.** (A) Simulations were performed in geometries with various ER geometries: “No ER”, “Node ER” and “Node/shaft ER”, in which there was no ER, discontinuous ER in nodes or nodes consisting in node/shaft alternations, respectively. (B) (Top) Neuronal stimulation protocol simulated for each geometry: Node 1 was stimulated at  $t=t_0=1\text{s}$ , while  $\text{Ca}^{2+}$  activity was monitored in nodes 1 and 2. (Bottom) Representative  $\text{Ca}^{2+}$  traces in nodes 1 and 2, in “No ER” (green), “Node ER” (blue) and “Node/shaft ER” (black) geometries, for  $d_{\text{shaft}} = \frac{d_0}{2}$ , expressed as SNR (see Methods). (C) Quantification of peak characteristics depending on ER geometry,  $d_{\text{shaft}} = \frac{d_0}{2}$  (“Node ER” in blue and “Node/shaft” in black). (C1)  $\text{Ca}^{2+}$  peak probability is higher in geometries with continuous compared to discontinuous ER, both in node 1 and 2 (\*\*\*). (C2) Time to 1<sup>st</sup> peak does not significantly change with ER geometry in Node 1 (p-value=0.59) but is higher in “Node/shaft ER” compared to “Node ER” geometry in Node 2 (p-value=0.04 \*). (C3) Peak amplitude is increased in “Node/shaft ER” compared to “Node ER” geometry, both, both in nodes 1 and 2 (\*\*\*). (C4) Peak duration is increased in “Node/shaft ER” compared to “Node ER” geometry, both in nodes 1 and 2 (\*\*\*). (C5) The frequency of IP<sub>3</sub>R opening is increased in “Node/shaft ER” compared to “Node ER” geometry, both in node 1 (p-value=0.01 \*) and 2 (p-value=0.02 \*).  $\text{Ca}^{2+}$  peak characteristics were not statistically different between node 1 and 2. (D) Schematic summarizing the conclusion of this figure: discontinuous ER geometry is associated with decreased  $\text{Ca}^{2+}$  peak probability and amplitude. Data are represented as mean  $\pm$  STD, n=20 for each geometry. Significance is assigned by \* for  $p \leq 0.05$ , \*\* for  $p \leq 0.01$ , \*\*\* for  $p \leq 0.001$ .

289 Overall, our simulation results highlight the effect of both cellular and  
290 ER geometry on  $\text{Ca}^{2+}$  peak amplitude and probability. A discontinuous  
291 ER geometry is associated with a decreased peak probability, duration and  
292 amplitude. Those results highlight the importance of investigating the ul-  
293 trastructure of intracellular  $\text{Ca}^{2+}$  stores in live tissue, as it might strongly  
294 influence local  $\text{Ca}^{2+}$  activity in the gliapil.  
295

### 296 **Thin shafts favor more robust signal propagation**

297 A single astrocyte branchlet can be in close contact to multiple synapses  
298 simultaneously [15, 27–29]. The frequency of stimulation of the branchlet  
299 could vary depending on the activity of the adjacent synapses, so that a  
300 connection of astrocytic nodes to co-active synapses would result in a high  
301 node stimulation frequency. We have thus tested the influence of the fre-  
302 quency of neuronal stimulation of neighboring nodes on the propagation  
303 of  $\text{Ca}^{2+}$  signals in branchlets. In order to do so, we have performed sim-  
304 ulations in which neighboring nodes were successively stimulated after a  
305 time period  $\tau_{\text{IP3}}$ , that varied from 50 ms to 5s (Fig 5A), while  $\text{Ca}^{2+}$  sig-  
306 nals were recorded in a remote node (Node 5). Representative  $\text{Ca}^{2+}$  traces  
307 in Node 5 depending on shaft width  $d_{\text{shaft}}$  and on  $\tau_{\text{IP3}}$  are presented in  
308 Fig 5A. Our first noticeable result is that the time to 1<sup>st</sup> peak in Node 5  
309 decreases with  $d_{\text{shaft}}$ , whatever the value of  $\tau_{\text{IP3}}$  (Fig 5B1). More specifi-  
310 cally, time to 1<sup>st</sup> peak is higher for  $d_{\text{shaft}}=d_0$  compared to both  $d_{\text{shaft}}=\frac{d_0}{2}$   
311 and  $\frac{d_0}{3}$ , while differences between  $d_{\text{shaft}}=\frac{d_0}{2}$  and  $\frac{d_0}{3}$  are not as striking.  
312 Moreover, the difference between  $d_{\text{shaft}}=d_0$ ,  $\frac{d_0}{2}$  and  $\frac{d_0}{3}$  increases with  $\tau_{\text{IP3}}$ .  
313 This suggests that geometries with  $d_{\text{shaft}}=d_0$  better discriminate slow from  
314 fast frequency of node stimulation compared to geometries with thinner  
315 shafts. Geometries with  $d_{\text{shaft}}=d_0$  are further characterized by a lower  
316  $\text{Ca}^{2+}$  peak probability in Node 5 compared to geometries with  $d_{\text{shaft}}=\frac{d_0}{2}$   
317 and  $\frac{d_0}{3}$  (Fig 5B2). More precisely,  $\text{Ca}^{2+}$  peak probability decreases as  $\tau_{\text{IP3}}$   
318 increases for  $d_{\text{shaft}}=d_0$ . This suggests that geometries with larger shafts  
319 could be associated with decreased signal propagation to remote nodes in  
320 case of successive node stimulation at low frequency ( $\tau_{\text{IP3}} > 2\text{s}$ ). In order  
321 to test the effect of our reflective boundary conditions, we have performed  
322 the same stimulation protocol in geometries in which the tetrahedra near  
323 the outer surface of Node 4 formed clamped boundary conditions (Supple-  
324 mental Fig S11). The effect of  $d_{\text{shaft}}$  and of  $\tau_{\text{IP3}}$  on  $\text{Ca}^{2+}$  peak probability  
325 and on the delay of signal onset was similar to simulations with reflective  
326 boundaries. Note that  $\text{Ca}^{2+}$  peak probability was lower and time to 1<sup>st</sup>  
327 peak higher compared to simulations with reflective boundary conditions.  
328

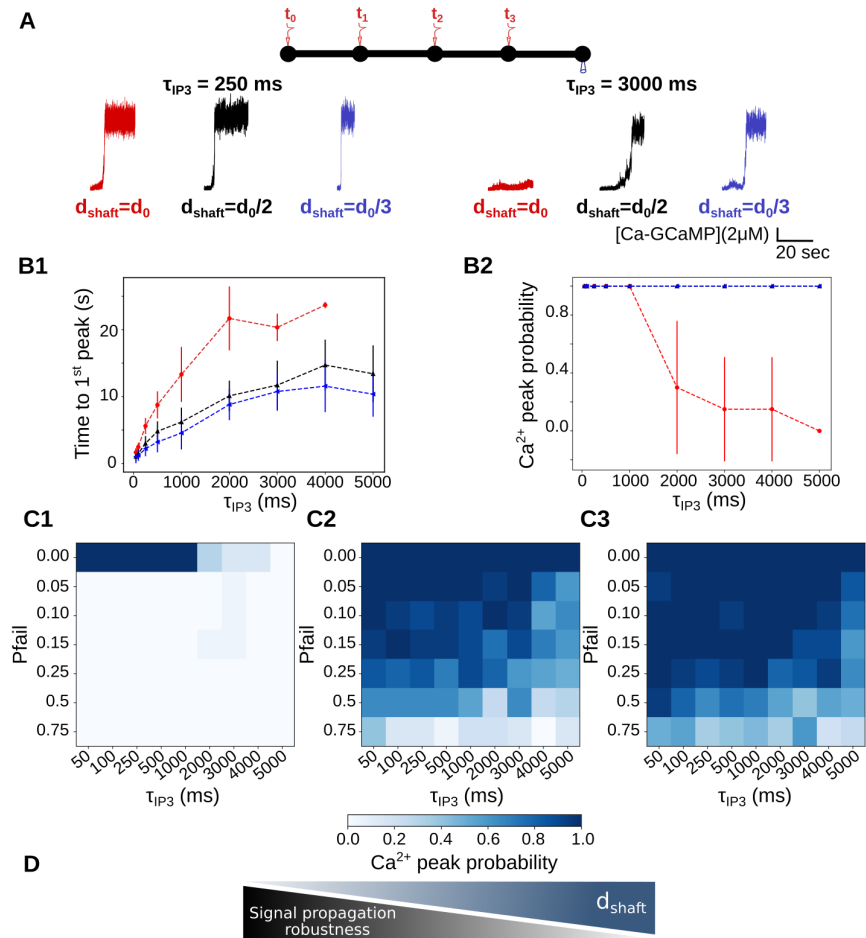

**Fig 5: Thin shafts are associated with a more robust signal propagation upon successive neuronal stimuli.** (A) (Top) Neuronal stimulation protocol: Node 1 is stimulated at  $t=t_0=5s$ , Node 2 at  $t_0 + \tau_{IP3}$ , Node 3 at  $t_0 + 2\tau_{IP3}$  and Node 4 at  $t_0 + 3\tau_{IP3}$ .  $Ca^{2+}$  activity is recorded in Node 5. (Bottom) Representative  $Ca^{2+}$  traces in Node 5 for shaft width  $d_{shaft} = d_0$  (red),  $\frac{d_0}{2}$  (black) and  $\frac{d_0}{3}$  (blue), with  $\tau_{IP3}=250ms$  (left) and 3000ms (right), expressed as SNR (see Methods). (B1) Time to 1<sup>st</sup> peak increases with  $\tau_{IP3}$  for  $d_{shaft}=d_0$  (\*\*\*) ,  $\frac{d_0}{2}$  (\*\*\*) and  $\frac{d_0}{3}$  (\*\*\*) . T-tests revealed that for any value of  $\tau_{IP3}$ , time to 1<sup>st</sup> peak is higher for  $d_{shaft}=d_0$  compared to  $d_{shaft}=\frac{d_0}{2}$  and  $\frac{d_0}{3}$ . Time to 1<sup>st</sup> peak is significantly higher when  $d_{shaft}=\frac{d_0}{2}$  compared to  $d_{shaft}=\frac{d_0}{3}$ , for most values of  $\tau_{IP3}$  ( $p=0.032^*$ ,  $0.0025^{**}$ ,  $0.034^*$ ,  $0.016^*$  and  $0.019^*$  for  $\tau_{IP3}=250, 500, 1000, 4000$  and  $5000$ , respectively). (B2)  $Ca^{2+}$  peak probability in Node 5 is lower for  $d_{shaft}=d_0$  compared to  $d_{shaft}=\frac{d_0}{2}$  and  $\frac{d_0}{3}$ .  $Ca^{2+}$  peak probability decreases as  $\tau_{IP3}$  increases for  $d_{shaft}=d_0$  (\*\*\*) . (C)  $Ca^{2+}$  peak probability in Node 5 (colorbar) as a function of  $\tau_{IP3}$  and of the probability of failure of node stimulation  $p_{fail}$ , for  $d_{shaft}=d_0$  (C1),  $d_{shaft}=\frac{d_0}{2}$  (C2) and  $d_{shaft}=\frac{d_0}{3}$  (C3), with  $p_{fail} \in [0, 1]$ . (D) Schematic summarizing the main conclusion of this figure: decreased shaft width allows signal propagation despite omitted node stimulation, thus favoring more robust signal propagation. Data are represented as mean  $\pm$  STD,  $n=20$  for each value of  $d_{shaft}$  and of  $\tau_{IP3}$ . Lines in panel B are guides for the eyes. The effect of  $d_{shaft}$  on each  $Ca^{2+}$  signal characteristic was tested using one-way ANOVA. Significance is assigned by \* for  $p \leq 0.05$ , \*\* for  $p \leq 0.01$ , \*\*\* for  $p \leq 0.001$ .

329 For  $\tau_{IP_3}=4s$  and  $d_{shaft}=\frac{d_0}{3}$ , signals were detected in Node 5  $11.55 \pm$   
330  $3.89$  s after the stimulation of Node 1, which means that they occurred  
331 before the stimulation of Node 4 ( $t=t_0 + 12s$  for  $\tau_{IP_3}=4s$ ). This phe-  
332 nomenon was not observed for  $d_{shaft}=d_0$ , for which time to 1<sup>st</sup> peak when  
333  $\tau_{IP_3}=4s$  was  $23.67 \pm 0.47$  s. This suggests that for  $d_{shaft}=\frac{d_0}{3}$ , contrary  
334 to  $d_{shaft}=d_0$ , one node stimulation could be omitted without having any  
335 consequence on  $Ca^{2+}$  peak probability in Node 5. In order to test this hy-  
336 pothesis, we have performed simulations in which the stimulation of Nodes  
337 2, 3 and 4 occurred with a given probability of failure  $p_{fail}$ . Simulations  
338 were performed for  $p_{fail}=0, 0.05, 0.1, 0.15, 0.25$  and  $0.75$ .  $Ca^{2+}$  peak prob-  
339 ability in Node 5, depending on  $p_{fail}$  and on  $\tau_{IP_3}$  is presented in Fig 5C, for  
340  $d_{shaft}=d_0$  (Fig 5C1),  $d_{shaft}=\frac{d_0}{2}$  (Fig 5C2) and  $d_{shaft}=\frac{d_0}{3}$  (Fig 5C3). As ex-  
341 pected,  $Ca^{2+}$  peak probability, despite high values of  $p_{fail}$ , increases when  
342  $d_{shaft}$  decreases. Thus, thin shafts can favor signal propagation by allowing  
343 the omission of a node stimulation. In that sense, geometries displaying  
344 thin shafts are characterized by a more robust signal propagation (Fig 5D).

345  
346 Together, our results suggest that, in the context of successive node  
347 stimulation, thin shafts are associated with an increase of  $Ca^{2+}$  peak prob-  
348 ability in more remote nodes, with a lower delay of signal onset, suggest-  
349 ing an increased signal propagation. Geometries with thick shafts (here  
350  $d_{shaft}=d_0$ ) are associated with lower signal propagation in case of low stim-  
351 ulation frequency (time period  $> 2s$ ), potentially favoring the formation of  
352 local  $Ca^{2+}$  hotspots. Our results further suggest that geometries with thick  
353 shafts could impair signal propagation when a branchlet is stimulated by  
354 different neuronal populations. In that sense, astrocyte branchlets with  
355 thick shafts would be better detectors of the surrounding neuronal stimuli.  
356 On the contrary, branchlets with thin shafts would allow less discriminating  
357 and more robust signal propagation events.

### 358 $Ca^{2+}$ indicators alter $Ca^{2+}$ peak characteristics

359 In order to measure  $Ca^{2+}$  signals, experiments rely on the use of  $Ca^{2+}$   
360 indicators, such as GCaMP, which correspond to molecules that fluoresce  
361 when bound to  $Ca^{2+}$ . The variations of fluorescence with time are moni-  
362 tored and normalized over the basal level of fluorescence ( $\Delta F/F_0$ ). Those  
363 methods thus do not measure the exact variations of free  $Ca^{2+}$  concentra-  
364 tion [ $Ca^{2+}$ ] but the variations of the concentration of  $Ca^{2+}$  bound to the  
365 indicator, here [Ca-GCaMP]. The resulting signal strongly depends on the  
366 concentration and kinetics of the indicator [20].

367 Here, in order to investigate the effect of  $d_{shaft}$  on free  $Ca^{2+}$  signals rather  
368 than on signals mediated by GCaMP, we have performed simulations in  
369 which no GCaMP molecules were added in the cytosol. Free  $Ca^{2+}$  dynam-  
370 ics was then monitored in node 1, while stimulating node 1 (Fig 6A). Free  
371  $Ca^{2+}$  signals were qualitatively (Fig 6A) and quantitatively (Fig 6B) differ-  
372 ent from Ca-GCaMP signals. No effect of  $d_{shaft}$  was observed on free  $Ca^{2+}$   
373 peak probability (Fig 6B1). Similarly to Ca-GCaMP signals, time to 1<sup>st</sup>  
374 peak decreased (Fig 6B2),  $IP_3R$  opening frequency (Fig 6B5), free  $Ca^{2+}$   
375 peak amplitude (Fig 6B3) and duration (Fig 6B4) increased when  $d_{shaft}$   
376 decreased. Consistently with previous reports [20,30,31], free  $Ca^{2+}$  signals  
377 strongly differed from Ca-GCaMP signals. More precisely, free  $Ca^{2+}$  sig-  
378 nals were characterized by a higher peak amplitude and frequency of  $IP_3R$   
379 opening as well as a lower peak duration and delay of peak onset than

380 Ca-GCaMP signals.

381 Overall, our results suggest that the use of  $\text{Ca}^{2+}$  indicators, and more  
382 generally  $\text{Ca}^{2+}$  buffering, is associated with an increased  $\text{Ca}^{2+}$  peak dura-  
383 tion and a decreased peak probability and amplitude (Fig 6D). Note that,  
384 even though free  $\text{Ca}^{2+}$  signals strongly differ from Ca-GCaMP signals,  
385 Ca-GCaMP signals can still provide relevant information on the qualita-  
386 tive effect of shaft width on  $\text{Ca}^{2+}$  dynamics, such as the increased peak  
387 probability, duration and amplitude when  $d_{\text{shaft}}$  decreases. As it is cur-  
388 rently impossible to measure free  $\text{Ca}^{2+}$  signals experimentally, our study  
389 highlights the importance of using computational tools for improving our  
390 understanding of  $\text{Ca}^{2+}$  signals.

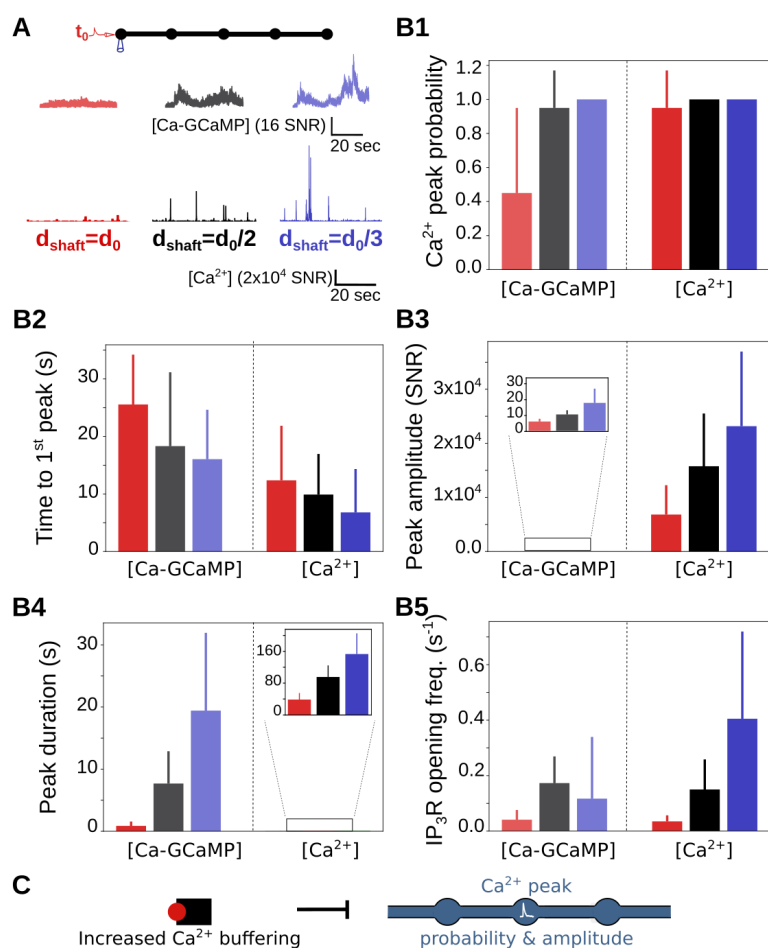

**Fig 6:  $\text{Ca}^{2+}$  indicators alter  $\text{Ca}^{2+}$  peak probability, duration and amplitude.** (A) In order to investigate free  $\text{Ca}^{2+}$  peak probability, no GCaMP molecules were added to the model. (Top) At  $t=t_0=1\text{s}$ , Node 1 was stimulated while  $\text{Ca}^{2+}$  concentration was monitored in node 1. (Middle) Representative Ca-GCaMP traces in node 1, in simulations containing GCaMP molecules in geometries with shaft width  $d_{\text{shaft}} = d_0$  (light red),  $\frac{d_0}{2}$  (grey) and  $\frac{d_0}{3}$  (light blue). (Bottom) Representative free  $\text{Ca}^{2+}$  traces in node 1, in the absence of GCaMP molecules, in geometries with shaft width  $d_{\text{shaft}} = d_0$  (red),  $\frac{d_0}{2}$  (black) and  $\frac{d_0}{3}$  (blue). The amplitude of Ca-GCaMP and free  $\text{Ca}^{2+}$  signals is expressed as SNR (see Methods). (B) Characteristics of free  $\text{Ca}^{2+}$  signals depending on  $d_{\text{shaft}}$ . Ca-GCaMP signals measured in simulations from Fig 3 are presented for comparison. (B1) Free  $\text{Ca}^{2+}$  peak probability does not vary with  $d_{\text{shaft}}$  (p-value=0.22). Ca-GCaMP peak probability is lower than free  $\text{Ca}^{2+}$  peak probability for  $d_{\text{shaft}} = d_0$  (\*\*\*). (B2) Time to 1<sup>st</sup> free  $\text{Ca}^{2+}$  peak increases with  $d_{\text{shaft}}$  (\*\*\*). Time to 1<sup>st</sup> Ca-GCaMP peak is higher than time to 1<sup>st</sup> free  $\text{Ca}^{2+}$  peak, for any value of  $d_{\text{shaft}}$  (\*\*\*). (B3) Free  $\text{Ca}^{2+}$  peak amplitude increases when  $d_{\text{shaft}}$  decreases (\*\*\*). Ca-GCaMP peak amplitude is lower than free  $\text{Ca}^{2+}$  peak amplitude, for any value of  $d_{\text{shaft}}$  (\*\*\*). (B4) Free  $\text{Ca}^{2+}$  peak duration increases when  $d_{\text{shaft}}$  decreases (\*\*\*). Ca-GCaMP peak duration is higher than free  $\text{Ca}^{2+}$  peak duration, for any value of  $d_{\text{shaft}}$  (\*\*\*). (B5) The frequency of  $\text{IP}_3\text{R}$  opening increases when  $d_{\text{shaft}}$  decreases (\*\*\*). (C) Schematic summarizing the main result from this figure: increased  $\text{Ca}^{2+}$  buffering is associated with decreased  $\text{Ca}^{2+}$  peak probability and amplitude. Data are represented as mean  $\pm$  STD,  $n=20$  for each geometry. The effect of  $d_{\text{shaft}}$  on each free  $\text{Ca}^{2+}$  signal characteristic was tested using one-way ANOVA. Significance is assigned by \* for  $p \leq 0.05$ , \*\* for  $p \leq 0.01$ , \*\*\* for  $p \leq 0.001$ .



## 391 Discussion

392 This study outlines the effect of the nanoscale morphology of astrocyte  
393 branchlets on the characteristics of  $\text{Ca}^{2+}$  signals. More precisely, the  
394 reticular morphology of branchlets, alternating between large and thinner  
395 cellular compartments [15,19,21], seems to increase  $\text{Ca}^{2+}$  peak probability,  
396 duration, amplitude and propagation (Fig 7A). We further propose plausible  
397 mechanisms that are associated with a decreased local  $\text{Ca}^{2+}$  activity:  
398 an increased shaft width, discontinuous ER geometry and increased  $\text{Ca}^{2+}$   
399 buffering (Fig 7B). Our results, in accordance with experimental data, sug-  
400 gest that thin shafts are associated with a decreased diffusion flux, i.e an  
401 increased compartmentalization of nodes. Thus, nodes, similarly to den-  
402 dritic spines [25], act as diffusion traps when shaft width is low. Note that,  
403 more than the value of shaft width itself, our results emphasize the effect  
404 of the ratio between node and shaft diameter on  $\text{Ca}^{2+}$  activity. The ge-  
405 ometries designed and used in this study, based on recent super-resolution  
406 images of the gliapil [15], emerge as interesting tools to investigate the in-  
407 fluence of the ultrastructure of fine astrocyte branchlets on the local  $\text{Ca}^{2+}$   
408 dynamics. By recording  $\text{Ca}^{2+}$  activity upon neuronal stimulation in small  
409 cellular compartments of the gliapil, which cannot be performed experi-  
410 mentally, our simulation results shed light on the mechanisms by which  
411 astrocyte morphology influences the frequency, amplitude and propagation  
412 of  $\text{Ca}^{2+}$  signals at the nanoscale.

413

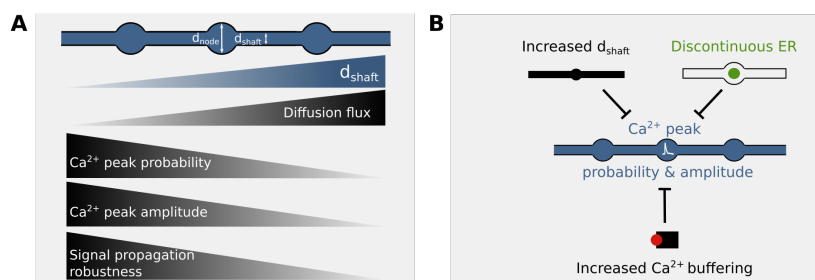

Fig 7: **Proposed mechanisms that regulate astrocytic  $\text{Ca}^{2+}$  activity at tripartite synapses.** (A) Proposed effects of shaft width  $d_{\text{shaft}}$  on  $\text{Ca}^{2+}$  signals. A decreased shaft width results in a decreased diffusion flux of molecules from nodes. This results in an increase of  $\text{Ca}^{2+}$  peak probability, amplitude and duration in the stimulated node. Finally, thinner shafts allow signal propagation despite omitted node stimulation upon successive stimuli, thus allowing more robust signal propagation. (B) Proposed mechanisms that decrease  $\text{Ca}^{2+}$  peak probability and amplitude: an increased shaft width  $d_{\text{shaft}}$ , a discontinuous ER geometry and an increased  $\text{Ca}^{2+}$  buffering.

414 Experimental  $\text{Ca}^{2+}$  recordings of astrocyte activity suggest that as-  
415 trocyte branchlets display both highly localized microdomain signals and  
416 propagating  $\text{Ca}^{2+}$  waves [5,9]. Our simulations suggest that the morphol-  
417 ogy of the cell and of its organelles can influence the formation of those  
418 diverse spatio-temporal properties. Notably, thinner shafts allow less dis-  
419 criminating and more robust signal propagation upon successive stimuli

420 compared to larger shafts. Thinner shafts indeed allow signal propagation  
421 despite the omission of some stimuli or when the time interval between  
422 successive stimuli is large. On the contrary, geometries with thick shafts  
423 seem to be more discriminating, potentially favoring the propagation of  
424 signals resulting from successive stimuli from co-active synapses. Cellular  
425 morphology thus emerges as a key parameter that regulates the active prop-  
426 agation of  $\text{Ca}^{2+}$  signals. Further quantification is required to better charac-  
427 terize the inter- and intra-cellular variability of the ultrastructure of astro-  
428 cyte branchlets and of its connectivity to the neighboring synapses. This  
429 will be crucial to better understand the integration of signals within astro-  
430 cytes and how specialized their communication with individual synapses is.

431  
432 In neurons, both experimental [32–34] and modelling [25, 35–41] stud-  
433 ies have suggested that spine morphology, more precisely thin neck width,  
434 favors the compartmentalization of  $\text{Ca}^{2+}$  signals within single spine heads.  
435 It has been proposed that the presence of small compartments, such as  
436 astrocyte nodes and spine heads, enables a 2 orders of magnitude faster  
437 homogenization of the concentration of second messengers, such as  $\text{Ca}^{2+}$ ,  
438 compared to larger compartments [32]. According to our simulation re-  
439 sults, nodes connected to thin shafts could favor the emergence of large  
440 signals at the site of neuron-astrocyte communication. Interestingly, we  
441 further propose that those amplified signals in nodes, instead of resulting  
442 in  $\text{Ca}^{2+}$  hotspots, favor active signal propagation. In response to spike  
443 timing-dependent plasticity (STDP) protocols [42] and after long-term po-  
444 tentiation [34], the neck of dendritic spines become wider and shorter.  
445 Recent *in vitro* and *in vivo* studies have reported that the geometry of the  
446 ER in neurons is also highly dynamic [43], experiencing fast fission and  
447 fusion events. The geometries of dendrites and of their organelles, which  
448 influence local signals, are thus highly dynamic. Further, the ER is variably  
449 distributed in spines, being preferentially present in large spines associated  
450 with strong synapses [44]. The variability of the geometry of astrocyte  
451 branchlets and of their organelles depending on physiological conditions  
452 remains to be uncovered and, according to our results, could strongly im-  
453 pact  $\text{Ca}^{2+}$  dynamics.

454  
455 Genetically encoded  $\text{Ca}^{2+}$  indicators (GECI) have been used exten-  
456 sively to investigate  $\text{Ca}^{2+}$  dynamics in astrocytes. They are presently the  
457 best tools for detecting  $\text{Ca}^{2+}$  signals in the whole astrocyte territory, in-  
458 cluding the very fine distal branchlets, while bulk-loading of  $\text{Ca}^{2+}$  indica-  
459 tors can only report signals in the soma and major branches, leaving  $\approx 90\%$   
460 of astrocyte area unsampled [10, 45]. Furthermore, using GECIs avoids the  
461 risk of altered cell physiology associated with bulk-loading [46] and can be  
462 used to image  $\text{Ca}^{2+}$  signals *in vivo* [5, 9, 10, 14, 47]. GECIs however present  
463 a major drawback: as they are genetically encoded, their exact concen-  
464 tration and distribution within the cell is unknown and thus generally  
465 not reported. Our results, in agreement with previous reports [20, 48, 49],  
466 highlight the modulation of  $\text{Ca}^{2+}$  signals by  $\text{Ca}^{2+}$  buffers such as GECIs.  
467 Interestingly, the increased  $\text{Ca}^{2+}$  peak probability, duration and ampli-  
468 tude of Ca-GCaMP peaks when  $d_{\text{shaft}}$  decreases was still observed for free  
469  $\text{Ca}^{2+}$  signals. As the concentration of GCaMP,  $[\text{GCaMP}]$ , can influence  
470 the size of Ca-GCaMP peaks [20], we have tested the sensitivity of our  
471 results to  $[\text{GCaMP}]$  (Supplemental Fig S12). The amplitude and duration  
472 of Ca-GCaMP signals varied with  $[\text{GCaMP}]$ , in accordance with previous

473 reports [20]. Importantly, the increase of peak amplitude and duration as  
474 well as the decrease of time to 1<sup>st</sup> peak when  $d_{\text{shaft}}$  decreases was observed  
475 for all tested values of [GCaMP]. This study highlights the importance of  
476 computational tools to investigate free  $\text{Ca}^{2+}$  signals and to quantify the  
477 effect of  $\text{Ca}^{2+}$  indicators on signal readout.

478  
479 Overall, our simulations illustrate how the morphology of fine astro-  
480 cyte branchlets, notably shaft width, and of their organelles influence local  
481  $\text{Ca}^{2+}$  activity. Importantly, this study highlights the counter-intuitive sig-  
482 nal amplification in compartmentalized nodes, resulting from a reduced  
483 diffusion flux from nodes connected to thin shafts. This study provides  
484 a better understanding of the mechanisms that govern  $\text{Ca}^{2+}$  dynamics in  
485 small volumes, which is notably crucial for disentangling neuron-astrocyte  
486 communication at tripartite synapses.

## 487 Methods

### 488 Stochastic spatially-explicit voxel-based simulations

489 In order to model astrocyte  $\text{Ca}^{2+}$  signals in astrocyte branchlets, we  
490 have used the voxel-based “GCaMP” implementation of the Inositol 3-  
491 Phosphate ( $\text{IP}_3$ ) receptor-dependent  $\text{Ca}^{2+}$  signaling model from Denizot  
492 et al [20], using the same reaction scheme and parameter values (Fig 1B).  
493 Briefly, we model  $\text{Ca}^{2+}$  fluxes in and out of the cytosol, mediated by  $\text{Ca}^{2+}$   
494 channels and pumps on the endoplasmic reticulum (ER) and on the plasma  
495 membrane.  $\text{Ca}^{2+}$  signals occur when some  $\text{IP}_3\text{R}$  channels are in the open  
496 state.  $\text{IP}_3$  can be synthesized by the  $\text{Ca}^{2+}$ -dependent activity of phospho-  
497 lipase C  $\delta$  ( $\text{PLC}\delta$ ) and the removal of  $\text{IP}_3$  molecules from the cytosol is  
498 expressed as a single decay rate.  $\text{IP}_3\text{R}$  kinetics is described by a Markov  
499 model, derived from De Young & Keizer’s model [23]. Each  $\text{IP}_3\text{R}$  molecule  
500 contains one  $\text{IP}_3$  binding site and two  $\text{Ca}^{2+}$  binding sites. An  $\text{IP}_3\text{R}$  is in  
501 the open state when in state {110} (first Ca site and  $\text{IP}_3$  bound, second  
502 Ca site free). Depending on the simulation, other diffusing molecules were  
503 added to the model, such as the fluorescent molecule ZSGreen and fluores-  
504 cent  $\text{Ca}^{2+}$  indicators, here  $10\ \mu\text{M}$  of GCaMP6s. GCaMPs are genetically-  
505 encoded  $\text{Ca}^{2+}$  indicators (GECIs) that are derived from the fluorescent  
506 protein GFP and the  $\text{Ca}^{2+}$  buffer calmodulin (see [50] for a review on  
507 GECIs). For further details on the kinetic scheme and model assumptions,  
508 please refer to Denizot et al. 2019 [20].

509  
510 The model was implemented using STEPS (<http://steps.sourceforge.net/>),  
511 a python package performing exact stochastic simulation of reaction-diffusion  
512 systems [51]. More precisely, STEPS uses a spatialized implementation of  
513 Gillespie’s SSA algorithm [52–54]. Simulations in STEPS can be performed  
514 in complex geometries in 3 spatial dimensions. Space is divided into well-  
515 mixed tetrahedral compartments, referred to as voxels. Reactions between  
516 2 molecules can only occur if they are located within the same voxel. Dif-  
517 fusion events are modeled as a decrease of the number of molecules in the  
518 original voxel and an increase in the number of molecules in its neighboring  
519 voxel. Boundary conditions, except when specified otherwise, were reflect-  
520 ive. STEPS enables to compute, in complex 3D geometries, reactions and  
521 diffusion in the cytosol as well as reactions between cytosolic molecules and  
522 molecules located at the plasma or ER membrane.

523

## 524 Geometries

525 Typical astrocyte branchlet geometries were designed from their recent  
526 experimental characterization in live tissue at high spatial resolution (50  
527 nm in x-y) [15]. Those geometries consist in alternations of bulbous struc-  
528 tures, nodes, connected to each other with cylindrical structures, shafts.  
529 Geometries with different shaft widths  $d_{\text{shaft}}$  were designed using Trelis soft-  
530 ware (<https://www.csimsoft.com/trelis>, Fig 1A). The geometry of a node  
531 was approximated as being a sphere of diameter 380 nm. Shaft geome-  
532 try consisted in a  $1\mu\text{m}$  long cylinder. Shaft diameter was defined relative  
533 to node diameter. For example, shaft diameter was the same as node  
534 diameter, i.e  $d_{\text{shaft}}=d_0=380$  nm. Similarly, shaft diameter was 190 nm  
535 and 127 nm for  $d_{\text{shaft}}=\frac{d_0}{2}$  and  $\frac{d_0}{3}$ , respectively. Cones were positioned  
536 between spheres and cylinders in order to create a smoother transition  
537 between nodes and shafts, better approximating the geometry observed  
538 experimentally. Cytosolic volume was thus  $V_1=0.620\mu\text{m}^3$ ,  $V_2=0.263\mu\text{m}^3$   
539 and  $V_3=0.195\mu\text{m}^3$ , for  $d_{\text{shaft}}=d_0$ ,  $\frac{d_0}{2}$  and  $\frac{d_0}{3}$ , respectively. A subset of sim-  
540 ulations were performed in a geometry with  $V_1=0.258\mu\text{m}^3$ . This geometry  
541 is characterized, similarly to geometries with  $d_{\text{shaft}}=d_0$ , by a node/shaft  
542 width ratio of 1. It contains cylinders of length 750 nm, diameter 285 nm  
543 and spheres of diameter 285 nm. As a first approximation, ER geometry  
544 was considered to be identical to the geometry of the astrocyte branchlet:  
545 node/shaft successions. ER nodes were aligned with cytosolic nodes. As  
546 no quantification of the ER volume compared to cellular volume was found  
547 for astrocytes in the literature, ER volume was 10% of the total branchlet  
548 volume, based on available data in neurons [55]. The cytosolic volume,  
549 plasma and ER membrane areas of the different “5Nodes” geometries are  
550 presented in Table 1.

551 In a subset of simulations, ER geometry varied. The shape of the cell  
552 was the same as in “5nodes” geometries (Fig 1). ER geometry consisting  
553 of node/shaft alternations, described above, is referred to as “Node/shaft  
554 ER”. “No ER” geometry contains no ER. “Node ER” is characterized by  
555 a discontinuous ER geometry, consisting in spheres of diameter 54 nm,  
556 located in cellular nodes. “Cyl ER” corresponds to a cylindrical ER, of  
557 length  $l_{\text{ER}}=6274$  nm and a diameter of 108, 54 and 36 nm, for  $d_{\text{shaft}}=d_0$ ,  
558  $\frac{d_0}{2}$  and  $\frac{d_0}{3}$ , respectively. The associated cytosolic volume, ER and plasma  
559 membrane area are presented in Table 1.

## 560 Protocol for simulating bleaching experiments

561 In order to test whether the idealized geometries presented in Fig 1 are a  
562 good approximation of the spongiform ultrastructure of astrocyte branch-  
563 lets, we have simulated their fluorescence recovery after photobleaching  
564 (FRAP) experiments. The principle of those experiments is summarized  
565 in Supplemental Fig S3A. Briefly, laser pulses are simulated on a node (re-  
566 gion of interest) while the fluorescence level is being recorded. At bleaching  
567 time, the fluorescence level in the region of interest decreases to  $I_0$ . Then,  
568 because of the diffusion of fluorescent molecules into the region of inter-  
569 est, fluorescence increases until it reaches a new steady state,  $I_{\text{inf}}$ . We  
570 characterize node compartmentalization by measuring the time  $\tau$  taken by  
571 fluorescing molecules to diffuse into the node to reach  $I_{\text{inf}}$ . In other words,

572 a high node compartmentalization will be associated with a high value of  
573  $\tau$ . Thus, 3 main parameters characterize bleaching traces:  $I_0$ ,  $\tau$  and  $I_{\text{inf}}$ .

574  
575 To mimic bleaching experiments in fine branchlets performed by Ari-  
576 zono et al [15], ZSGreen molecules were added to simulation space. After  
577 2 seconds of simulation, providing the basal level of fluorescence, 60% of  
578 ZSGreen molecules were bleached. In order to fit  $I_0$  and  $I_{\text{inf}}$  that were mea-  
579 sured experimentally, and as bleaching time lasted 10 ms in experiments  
580 and 1 ms in simulations, the bleached volume in simulations was adjusted  
581 depending on the geometry (see Fig 2A). Bleaching was simulated as a tran-  
582 sition from ZSGreen molecules to ZSGreen-bleached molecules, the latter  
583 being considered as non-fluorescing molecules. Screenshots of simulations,  
584 illustrating the diffusion of ZSGreen and ZSGreen-bleached molecules, are  
585 presented in Fig S2B. The number of ZSGreen molecules in the central  
586 node was recorded over simulation time and a fit was performed following  
587 equation 1 to determine the values of  $I_0$ ,  $I_{\text{inf}}$  and  $\tau$ .

$$I(t) = I_0 - (I_0 - I_{\text{inf}})e^{-t/\tau} \quad (1)$$

588 , where  $I(t)$  is the level of fluorescence measured at time  $t$ . The coeffi-  
589 cient of diffusion,  $D_{\text{ZSGreen}}$ , and the concentration,  $[\text{ZSGreen}]$ , of ZSGreen  
590 were adjusted to fit experimental data. Indeed, the amplitude of  $[\text{ZSGreen}]$   
591 fluctuations at steady state is inversely proportional to the number of ZS-  
592 Green molecules in the geometry. In other words, fluorescence signals are  
593 more noisy when  $[\text{ZSGreen}]$  is low. Moreover, the autocorrelation of those  
594 fluctuations depends on the coefficient of diffusion of ZSGreen,  $D_{\text{ZSGreen}}$ .  
595 If  $D_{\text{ZSGreen}}$  increases, the autocorrelation of Lag, where Lag is the au-  
596 tocorrelation delay, will decrease faster as Lag increases. Comparing the  
597 fluctuations of  $[\text{ZSGreen}]$  and its autocorrelation in experiments and in sim-  
598 ulations thus enabled to find the values of  $D_{\text{ZSGreen}}$  and of  $[\text{ZSGreen}]$  that  
599 allowed for the best fit to experimental data. In the simulations presented  
600 here,  $D_{\text{ZSGreen}}=90 \mu\text{m}^2 \cdot \text{s}^{-1}$  and  $[\text{ZSGreen}]=25 \mu\text{M}$ .

## 601 Protocols for simulating neuronal stimulation

602 In order to investigate the propagation of  $\text{Ca}^{2+}$  signals from nodes that  
603 contact neuronal spines, we have developed 2 different protocols for our  
604 simulations, performed in the geometries presented in Fig 1. As nodes  
605 were the site of  $\text{Ca}^{2+}$  signal initiation [15] and as most spines contacted  
606 nodes rather than shafts, we have simulated neuronal stimulation in nodes.

- 607  
608 • In the first protocol, 100  $\text{IP}_3$  molecules were infused in Node 1, at  
609  $t=t_0=1\text{s}$ , while  $\text{Ca}^{2+}$  activity was monitored in Node 1 and in the  
610 neighboring node, Node 2 (see e.g Fig 3A). Simulations were per-  
611 formed in geometries with varying shaft width  $d_{\text{shaft}}$ .
- 612 • In the second protocol, we have investigated signal propagation in  
613 the node/shaft geometry depending on shaft width  $d_{\text{shaft}}$  when sev-  
614 eral nodes were successively stimulated. In “5nodes” geometries, 50  
615  $\text{IP}_3$  molecules were infused at  $t_0=5\text{s}$ ,  $t_0 + \tau_{\text{IP}_3}$ ,  $t_0 + 2\tau_{\text{IP}_3}$ ,  $t_0 + 3\tau_{\text{IP}_3}$  in  
616 Nodes 1, 2, 3 and 4, respectively. During the whole simulation time,  
617  $\text{Ca}^{2+}$  activity was recorded in Node 5 (see Fig 5). In a subset of sim-  
618 ulations, stimulation of Nodes 2, 3 and 4 occurred with a probability  
619  $1 - p_{\text{fail}}$ , with  $p_{\text{fail}} \in [0, 1]$ .

## 620 Peak detection and analysis

621 The same strategy as developed by Denizot et al. [20] was used for de-  
622 tecting and analysing  $\text{Ca}^{2+}$  signals. Briefly, basal concentration of  $\text{Ca}^{2+}$ ,  
623  $[Ca]_b$ , was defined based on a histogram of the number of  $\text{Ca}^{2+}$  ions in  
624 the absence of neuronal stimulation. Peak initiation corresponded to the  
625 time when  $[Ca^{2+}]$  was higher than the following threshold:  $[Ca]_b + n\sigma_{Ca}$ ,  
626 where  $\sigma_{Ca}$  is the standard deviation of  $[Ca^{2+}]$  histogram in the absence  
627 of neuronal stimulation. The value of  $n$  was set by hand depending on  
628 signal/noise ratio of the simulation of interest. Peak termination corre-  
629 sponded to the time when  $[Ca^{2+}]$  decreased below the peak threshold.  
630 Several parameters were analyzed to characterize  $\text{Ca}^{2+}$  signals. Peak am-  
631 plitude,  $A$ , corresponds to the maximum  $[Ca^{2+}]$  measured during the peak  
632 duration. It is expressed as signal to noise ratio  $SNR = \frac{A - [Ca]_b}{[Ca]_b}$ . Peak  
633 duration corresponds to the time between peak initiation and peak termi-  
634 nation. Time to 1<sup>st</sup> peak corresponds to the delay between the beginning  
635 of the simulation and the first peak detection, measured in the cellular  
636 compartment of interest. Peak probability corresponds to the fraction of  
637 simulations in which at least one peak was detected during simulation time  
638 in the region of interest.  $\text{Ca}^{2+}$  residency time was measured by performing  
639  $n=300$  simulations for each value of  $d_{\text{shaft}}$ , in which only 1  $\text{Ca}^{2+}$  ion was  
640 added to node 1, without other molecular species.  $\text{Ca}^{2+}$  residency time  
641 corresponds to the time taken for the ion to diffuse away from node 1.

## 642 Statistical analysis

643 For each parameter set, 20 simulations, with different seeds, were gener-  
644 ated. Each parameter describing  $\text{Ca}^{2+}$  dynamics was expressed as mean  
645  $\pm$  standard deviation. The effect of  $d_{\text{shaft}}$  on each  $\text{Ca}^{2+}$  signal characteris-  
646 tic was tested using one-way ANOVA. Comparison between two different  
647 conditions was performed using unpaired Student T-test if values followed  
648 a Gaussian distribution, Mann-Whitney test otherwise. Significance is as-  
649 signed by \* for  $p \leq 0.05$ , \*\* for  $p \leq 0.01$ , \*\*\* for  $p \leq 0.001$ .

## 650 Simulation code

651 The simulation code, implemented with STEPS 3.5.0, and the meshes  
652 are available on ModelDB [56] at <http://modeldb.yale.edu/266928>, access  
653 code: lto42@tpk3D?. The original model from Denizot et al. [20] is avail-  
654 able at <http://modeldb.yale.edu/247694>.

## 655 References

- 656 [1] A. Verkhratsky and M. Nedergaard, “Physiology of Astroglia,” *Phys-*  
657 *iological Reviews*, vol. 98, pp. 239–389, Jan. 2018.
- 658 [2] A. Araque, V. Parpura, R. P. Sanzgiri, and P. G. Haydon, “Tripar-
- 659 tite synapses: glia, the unacknowledged partner,” *Trends in Neuro-*  
660 *sciences*, vol. 22, pp. 208–215, May 1999.
- 661 [3] C. Giaume and L. Venance, “Intercellular calcium signaling and gap
- 662 junctional communication in astrocytes,” *Glia*, vol. 24, pp. 50–64,  
663 Sept. 1998.
- 664 [4] M. D. Haustein, S. Kracun, X.-H. Lu, T. Shih, O. Jackson-Weaver,  
665 X. Tong, J. Xu, X. W. Yang, T. J. O’Dell, J. S. Marvin, M. H. Ellis-
- 666 man, E. A. Bushong, L. L. Looger, and B. S. Khakh, “Conditions and
- 667 constraints for astrocyte calcium signaling in the hippocampal mossy
- 668 fiber pathway,” *Neuron*, vol. 82, pp. 413–429, Apr. 2014.
- 669 [5] E. Bindocci, I. Savtchouk, N. Liaudet, D. Becker, G. Carriero, and
- 670 A. Volterra, “Three-dimensional  $\text{Ca}^{2+}$  imaging advances understand-
- 671 ing of astrocyte biology,” *Science*, vol. 356, p. eaai8185, May 2017.
- 672 [6] M. A. Di Castro, J. Chuquet, N. Liaudet, K. Bhaukaurally, M. San-
- 673 tello, D. Bouvier, P. Tiret, and A. Volterra, “Local  $\text{Ca}^{2+}$  detection and
- 674 modulation of synaptic release by astrocytes,” *Nature Neuroscience*,
- 675 vol. 14, pp. 1276–1284, Oct. 2011.
- 676 [7] A. Panatier, J. Vallée, M. Haber, K. K. Murai, J.-C. Lacaille, and
- 677 R. Robitaille, “Astrocytes are endogenous regulators of basal trans-
- 678 mission at central synapses,” *Cell*, vol. 146, pp. 785–798, Sept. 2011.
- 679 [8] J. L. Stobart, K. D. Ferrari, M. J. P. Barrett, C. Glück, M. J. Stobart,
- 680 M. Zuend, and B. Weber, “Cortical Circuit Activity Evokes Rapid As-
- 681 trocyte Calcium Signals on a Similar Timescale to Neurons,” *Neuron*,
- 682 vol. 98, pp. 726–735.e4, May 2018.
- 683 [9] R. Srinivasan, B. S. Huang, S. Venugopal, A. D. Johnston, H. Chai,
- 684 H. Zeng, P. Golshani, and B. S. Khakh, “ $\text{Ca}^{2+}$  signaling in astro-
- 685 cytes from  $\text{Ip3r2}^{-/-}$  mice in brain slices and during startle responses
- 686 in vivo,” *Nature Neuroscience*, vol. 18, pp. 708–717, May 2015.
- 687 [10] E. Shigetomi, E. A. Bushong, M. D. Haustein, X. Tong, O. Jackson-
- 688 Weaver, S. Kracun, J. Xu, M. V. Sofroniew, M. H. Ellisman, and B. S.
- 689 Khakh, “Imaging calcium microdomains within entire astrocyte ter-
- 690 ritories and endfeet with GCaMPs expressed using adeno-associated
- 691 viruses,” *The Journal of General Physiology*, vol. 141, pp. 633–647,  
692 May 2013.
- 693 [11] M. W. Sherwood, M. Arizono, C. Hisatsune, H. Bannai, E. Ebisui,
- 694 J. L. Sherwood, A. Panatier, S. H. R. Oliet, and K. Mikoshiba, “As-
- 695 trocytic  $\text{IP}_3\text{Rs}$ : Contribution to  $\text{Ca}^{2+}$  signalling and hippocampal
- 696 LTP,” *Glia*, vol. 65, pp. 502–513, Mar. 2017.
- 697 [12] Y. Otsu, K. Couchman, D. G. Lyons, M. Collot, A. Agarwal, J.-M.
- 698 Mallet, F. W. Pfrieger, D. E. Bergles, and S. Chrapak, “Calcium dy-
- 699 namics in astrocyte processes during neurovascular coupling,” *Nature*  
700 *Neuroscience*, vol. 18, pp. 210–218, Feb. 2015.

- 701 [13] B. L. Lind, A. R. Brazhe, S. B. Jessen, F. C. C. Tan, and M. J. Lau-  
702 ritzen, “Rapid stimulus-evoked astrocyte  $\text{Ca}^{2+}$  elevations and hemo-  
703 dynamic responses in mouse somatosensory cortex in vivo,” *Proceed-*  
704 *ings of the National Academy of Sciences*, p. 201310065, Nov. 2013.
- 705 [14] A. Agarwal, P.-H. Wu, E. G. Hughes, M. Fukaya, M. A. Tischfield,  
706 A. J. Langseth, D. Wirtz, and D. E. Bergles, “Transient Opening of  
707 the Mitochondrial Permeability Transition Pore Induces Microdomain  
708 Calcium Transients in Astrocyte Processes,” *Neuron*, vol. 93, pp. 587–  
709 605.e7, Feb. 2017.
- 710 [15] M. Arizono, V. V. G. K. Inavalli, A. Panatier, T. Pfeiffer, J. Angibaud,  
711 F. Levet, M. J. T. T. Veer, J. Stobart, L. Bellocchio, K. Mikoshiba,  
712 G. Marsicano, B. Weber, S. H. R. Oliet, and U. V. Nägerl, “Struc-  
713 tural basis of astrocytic  $\text{Ca}^{2+}$  signals at tripartite synapses,” *Nature*  
714 *Communications*, vol. 11, pp. 1–15, Apr. 2020. Number: 1 Publisher:  
715 Nature Publishing Group.
- 716 [16] E. A. Bushong, M. E. Martone, Y. Z. Jones, and M. H. Ellisman,  
717 “Protoplasmic astrocytes in CA1 stratum radiatum occupy separate  
718 anatomical domains,” *The Journal of Neuroscience: The Official*  
719 *Journal of the Society for Neuroscience*, vol. 22, pp. 183–192, Jan.  
720 2002.
- 721 [17] N. A. Oberheim, X. Wang, S. Goldman, and M. Nedergaard, “Astro-  
722 cytic complexity distinguishes the human brain,” *Trends in Neuro-*  
723 *sciences*, vol. 29, pp. 547–553, Oct. 2006.
- 724 [18] T. Kosaka and K. Hama, “Three-dimensional structure of as-  
725 trocytes in the rat dentate gyrus,” *Journal of Comparative*  
726 *Neurology*, vol. 249, no. 2, pp. 242–260, 1986. eprint:  
727 <https://onlinelibrary.wiley.com/doi/pdf/10.1002/cne.902490209>.
- 728 [19] J. Grosche, V. Matyash, T. Möller, A. Verkhratsky, A. Reichenbach,  
729 and H. Kettenmann, “Microdomains for neuron–glia interaction: par-  
730 allel fiber signaling to Bergmann glial cells,” *Nature Neuroscience*,  
731 vol. 2, pp. 139–143, Feb. 1999.
- 732 [20] A. Denizot, M. Arizono, U. V. Nägerl, H. Soula, and H. Berry, “Simu-  
733 lation of calcium signaling in fine astrocytic processes: Effect of spatial  
734 properties on spontaneous activity,” *PLOS Computational Biology*,  
735 vol. 15, p. e1006795, Aug. 2019.
- 736 [21] A. Panatier, M. Arizono, and U. V. Nägerl, “Dissecting tripartite  
737 synapses with STED microscopy,” *Phil. Trans. R. Soc. B*, vol. 369,  
738 p. 20130597, Oct. 2014.
- 739 [22] A. Denizot, H. Berry, and S. Venugopal, “Computational Modeling of  
740 Intracellular  $\text{Ca}^{2+}$  Signals in Astrocytes,” *Encyclopedia of Computa-*  
741 *tional Neuroscience*, p. Submitted, 2019. Submitted.
- 742 [23] G. W. De Young and J. Keizer, “A single-pool inositol 1,4,5-  
743 trisphosphate-receptor-based model for agonist-stimulated oscillations  
744 in  $\text{Ca}^{2+}$  concentration,” *Proceedings of the National Academy of Sci-*  
745 *ences*, vol. 89, pp. 9895–9899, Oct. 1992.



- 746 [24] I. Bezprozvanny, J. Watras, and B. E. Ehrlich, “Bell-shaped calcium-  
747 response curves of Ins(1,4,5)P<sub>3</sub>- and calcium-gated channels from en-  
748 doplasmic reticulum of cerebellum,” *Nature*, vol. 351, pp. 751–754,  
749 June 1991.
- 750 [25] F. Santamaria, S. Wils, E. De Schutter, and G. J. Augustine, “The  
751 diffusional properties of dendrites depend on the density of dendritic  
752 spines,” *The European Journal of Neuroscience*, vol. 34, pp. 561–568,  
753 Aug. 2011.
- 754 [26] Z. Schuss, A. Singer, and D. Holcman, “The narrow escape problem  
755 for diffusion in cellular microdomains,” *Proceedings of the National  
756 Academy of Sciences*, vol. 104, pp. 16098–16103, Oct. 2007. Publisher:  
757 National Academy of Sciences Section: Physical Sciences.
- 758 [27] A. Reichenbach, A. Derouiche, and F. Kirchhoff, “Morphology and dy-  
759 namics of perisynaptic glia,” *Brain Research Reviews*, vol. 63, pp. 11–  
760 25, May 2010.
- 761 [28] M. R. Witcher, S. A. Kirov, and K. M. Harris, “Plasticity of perisynap-  
762 tic astroglia during synaptogenesis in the mature rat hippocampus,”  
763 *Glia*, vol. 55, pp. 13–23, Jan. 2007.
- 764 [29] C. Cali, M. Agus, K. Kare, D. J. Boges, H. Lehvaslaiho, M. Hadwiger,  
765 and P. J. Magistretti, “3D cellular reconstruction of cortical glia and  
766 parenchymal morphometric analysis from Serial Block-Face Electron  
767 Microscopy of juvenile rat,” *Progress in Neurobiology*, p. 101696, Sept.  
768 2019.
- 769 [30] T. M. Bartol, D. X. Keller, J. P. Kinney, C. L. Bajaj, K. M. Har-  
770 ris, T. J. Sejnowski, and M. B. Kennedy, “Computational reconstitu-  
771 tion of spine calcium transients from individual proteins,” *Frontiers  
772 in Synaptic Neuroscience*, vol. 7, Oct. 2015.
- 773 [31] A. Majewska, E. Brown, J. Ross, and R. Yuste, “Mechanisms of Cal-  
774 cium Decay Kinetics in Hippocampal Spines: Role of Spine Calcium  
775 Pumps and Calcium Diffusion through the Spine Neck in Biochemical  
776 Compartmentalization,” *Journal of Neuroscience*, vol. 20, pp. 1722–  
777 1734, Mar. 2000.
- 778 [32] R. Yuste, A. Majewska, and K. Holthoff, “From form to function: cal-  
779 cium compartmentalization in dendritic spines,” *Nature Neuroscience*,  
780 vol. 3, pp. 653–659, July 2000.
- 781 [33] J. Noguchi, M. Matsuzaki, G. C. R. Ellis-Davies, and H. Kasai, “Spine-  
782 Neck Geometry Determines NMDA Receptor-Dependent Ca<sup>2+</sup> Sig-  
783 naling in Dendrites,” *Neuron*, vol. 46, pp. 609–622, May 2005.
- 784 [34] J. Tønnesen, G. Katona, B. Rózsa, and U. V. Nägerl, “Spine neck  
785 plasticity regulates compartmentalization of synapses,” *Nature Neu-  
786 roscience*, vol. 17, pp. 678–685, May 2014. Number: 5 Publisher:  
787 Nature Publishing Group.
- 788 [35] H. Schmidt and J. Eilers, “Spine neck geometry determines spino-  
789 dendritic cross-talk in the presence of mobile endogenous calcium  
790 binding proteins,” *Journal of Computational Neuroscience*, vol. 27,  
791 pp. 229–243, Oct. 2009.

- 792 [36] A. Biess, E. Korkotian, and D. Holcman, “Diffusion in a dendritic  
793 spine: The role of geometry,” *Physical Review E*, vol. 76, p. 021922,  
794 Aug. 2007. Publisher: American Physical Society.
- 795 [37] C. M. Simon, I. Hepburn, W. Chen, and E. D. Schutter, “The role of  
796 dendritic spine morphology in the compartmentalization and delivery  
797 of surface receptors,” *Journal of Computational Neuroscience*, vol. 36,  
798 pp. 483–497, June 2014.
- 799 [38] M. Bell, T. Bartol, T. Sejnowski, and P. Rangamani, “Dendritic spine  
800 geometry and spine apparatus organization govern the spatiotemporal  
801 dynamics of calcium,” *The Journal of General Physiology*, vol. 151,  
802 pp. 1017–1034, Aug. 2019.
- 803 [39] D. Holcman and Z. Schuss, “Modeling Calcium Dynamics in Dendritic  
804 Spines,” *SIAM Journal on Applied Mathematics*, vol. 65, pp. 1006–  
805 1026, Jan. 2005.
- 806 [40] D. Holcman and Z. Schuss, “Diffusion laws in dendritic spines,” *The  
807 Journal of Mathematical Neuroscience*, vol. 1, p. 10, Oct. 2011.
- 808 [41] A. Cugno, T. M. Bartol, T. J. Sejnowski, R. Iyengar, and P. Ranga-  
809 mani, “Geometric principles of second messenger dynamics in den-  
810 dendritic spines,” *Scientific Reports*, vol. 9, pp. 1–18, Aug. 2019. Number:  
811 1 Publisher: Nature Publishing Group.
- 812 [42] R. Araya, T. P. Vogels, and R. Yuste, “Activity-dependent dendritic  
813 spine neck changes are correlated with synaptic strength,” *Proceedings  
814 of the National Academy of Sciences*, vol. 111, pp. E2895–E2904, July  
815 2014. Publisher: National Academy of Sciences Section: PNAS Plus.
- 816 [43] K. Kucharz, T. Wieloch, and H. Toresson, “Fission and Fusion of  
817 the Neuronal Endoplasmic Reticulum,” *Translational Stroke Research*,  
818 vol. 4, pp. 652–662, Dec. 2013.
- 819 [44] N. Holbro, A. Grunditz, and T. G. Oertner, “Differential distribution  
820 of endoplasmic reticulum controls metabotropic signaling and plastic-  
821 ity at hippocampal synapses,” *Proceedings of the National Academy of  
822 Sciences*, vol. 106, pp. 15055–15060, Sept. 2009. Publisher: National  
823 Academy of Sciences Section: Biological Sciences.
- 824 [45] A. M. B. Reeves, E. Shigetomi, and B. S. Khakh, “Bulk Loading of  
825 Calcium Indicator Dyes to Study Astrocyte Physiology: Key Lim-  
826 itations and Improvements Using Morphological Maps,” *Journal of  
827 Neuroscience*, vol. 31, pp. 9353–9358, June 2011. Publisher: Society  
828 for Neuroscience Section: Brief Communications.
- 829 [46] W. J. Nett, S. H. Oloff, and K. D. McCarthy, “Hippocampal Astro-  
830 cytes In Situ Exhibit Calcium Oscillations That Occur Independent of  
831 Neuronal Activity,” *Journal of Neurophysiology*, vol. 87, pp. 528–537,  
832 Jan. 2002.
- 833 [47] M. Paukert, A. Agarwal, J. Cha, V. A. Doze, J. U. Kang, and D. E.  
834 Bergles, “Norepinephrine controls astroglial responsiveness to local  
835 circuit activity,” *Neuron*, vol. 82, pp. 1263–1270, June 2014.

- 836 [48] A. Skupin, H. Kettenmann, U. Winkler, M. Wartenberg, H. Sauer,  
837 S. C. Tovey, C. W. Taylor, and M. Falcke, “How Does Intracellular  
838  $\text{Ca}^{2+}$  Oscillate: By Chance or by the Clock?,” *Biophysical Journal*,  
839 vol. 94, pp. 2404–2411, Mar. 2008.
- 840 [49] S. Rüdiger, C. Nagaiah, G. Warnecke, and J. Shuai, “Calcium Do-  
841 mains around Single and Clustered IP3 Receptors and Their Modula-  
842 tion by Buffers,” *Biophysical Journal*, vol. 99, pp. 3–12, July 2010.
- 843 [50] E. Shigetomi, S. Patel, and B. S. Khakh, “Probing the Complexities of  
844 Astrocyte Calcium Signaling,” *Trends in Cell Biology*, vol. 26, pp. 300–  
845 312, Apr. 2016.
- 846 [51] I. Hepburn, W. Chen, S. Wils, and E. De Schutter, “STEPS: ef-  
847 ficient simulation of stochastic reaction–diffusion models in realistic  
848 morphologies,” *BMC Systems Biology*, vol. 6, no. 1, p. 36, 2012.
- 849 [52] D. T. Gillespie, “Exact stochastic simulation of coupled chemical re-  
850 actions,” *The Journal of Physical Chemistry*, vol. 81, pp. 2340–2361,  
851 Dec. 1977.
- 852 [53] S. A. Isaacson and D. Isaacson, “The Reaction-Diffusion Master Equa-  
853 tion, Diffusion Limited Reactions, and Singular Potentials,” *Physical*  
854 *Review. E, Statistical, Nonlinear, and Soft Matter Physics*, vol. 80,  
855 p. 066106, Dec. 2009.
- 856 [54] S. Smith and R. Grima, “Spatial Stochastic Intracellular Kinetics: A  
857 Review of Modelling Approaches,” *Bulletin of Mathematical Biology*,  
858 May 2018.
- 859 [55] J. Spacek and K. M. Harris, “Three-Dimensional Organization of  
860 Smooth Endoplasmic Reticulum in Hippocampal CA1 Dendrites and  
861 Dendritic Spines of the Immature and Mature Rat,” *Journal of Neu-*  
862 *roscience*, vol. 17, pp. 190–203, Jan. 1997.
- 863 [56] R. A. McDougal, T. M. Morse, T. Carnevale, L. Marenco, R. Wang,  
864 M. Migliore, P. L. Miller, G. M. Shepherd, and M. L. Hines, “Twenty  
865 years of ModelDB and beyond: building essential modeling tools for  
866 the future of neuroscience,” *Journal of Computational Neuroscience*,  
867 vol. 42, pp. 1–10, Feb. 2017.

## 868 **Competing Interests statement**

869 The authors declare no competing financial interests.
